# Supplementary material for: A systematic review and meta-analysis of transdiagnostic cognitive behavioural therapies for emotional disorders
Source: PubMed Central journal article supplement (PMC10963275; doi:10.1038/s41562-023-01787-3), 2024-01-16
Supplement: 41562_2023_1787_MOESM1_ESM.pdf [file 41562_2023_1787_MOESM1_ESM.pdf]

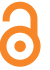

---

# A systematic review and meta-analysis of transdiagnostic cognitive behavioural therapies for emotional disorders

---

In the format provided by the authors and unedited

---

**Supplementary Materials**

“A systematic review and meta-analysis of transdiagnostic cognitive behavioral therapies for emotional disorders”

|                                                                                                                                                                                                    |    |
|----------------------------------------------------------------------------------------------------------------------------------------------------------------------------------------------------|----|
| <b>Supplementary Tables</b>                                                                                                                                                                        | 4  |
| <b>Supplementary Table 1.</b> Overview of content and setup of the investigated TD-CBT protocols                                                                                                   | 4  |
| <b>Supplementary Table 2.</b> Search strings for all databases that were included in the systematic search                                                                                         | 8  |
| <b>Supplementary Table 3.</b> Overview of reasons for exclusion for each study that was full-text screened                                                                                         | 9  |
| <b>Supplementary Table 4.</b> Within-group effect sizes for TD treatments at pretest compared to the end of treatment and follow-up (FU) for depression and anxiety                                | 18 |
| <b>Supplementary Table 5.</b> Between-group effect sizes of depressive and anxiety symptoms for transdiagnostic treatments compared to control groups at the end of treatment, excluding outliers. | 19 |
| <b>Supplementary Table 6.</b> Between-group effect sizes of depressive and anxiety symptoms for transdiagnostic treatments compared to control groups at follow-up, excluding outliers.            | 20 |
| <b>Supplementary Table 7.</b> Within-group effect sizes for TD treatments at pretest compared to the end of treatment and follow-up (FU) for depression and anxiety applying 0.3 as a correlation  | 22 |
| <b>Supplementary Table 8.</b> Within-group effect sizes for TD treatments at pretest compared to the end of treatment and follow-up (FU) for depression and anxiety applying 0.7 as a correlation  | 23 |
| <b>Supplementary Figures</b>                                                                                                                                                                       | 24 |
| <b>Supplementary Figure 1.</b> Summary plot of risk of bias assessment                                                                                                                             | 24 |
| <b>Supplementary Figure 2.</b> Forest plot for depression comparing TD-CBT vs. controls at 3-month follow-up                                                                                       | 24 |
| <b>Supplementary Figure 3.</b> Forest plot for depression comparing TD-CBT vs. controls at 6-month follow-up                                                                                       | 25 |
| <b>Supplementary Figure 4.</b> Forest plot for depression comparing TD-CBT vs. controls at 12-month follow-up                                                                                      | 25 |
| <b>Supplementary Figure 5.</b> Forest plot for depression comparing TD-CBT vs. controls at 24-month follow-up                                                                                      | 26 |
| <b>Supplementary Figure 6.</b> Forest plot for anxiety comparing TD-CBT vs. controls at 3-month follow-up                                                                                          | 26 |

|                                                                                                                              |    |
|------------------------------------------------------------------------------------------------------------------------------|----|
| <b>Supplementary Figure 7.</b> Forest plot for anxiety comparing TD-CBT vs. controls at 6-month follow-up                    | 27 |
| <b>Supplementary Figure 8.</b> Forest plot for anxiety comparing TD-CBT vs. controls at 12-month follow-up                   | 27 |
| <b>Supplementary Figure 9.</b> Forest plot for anxiety comparing TD-CBT vs. controls at 24-month follow-up                   | 28 |
| <b>Supplementary Figure 10.</b> Forest plot for depression from pre- to post-treatment                                       | 29 |
| <b>Supplementary Figure 11.</b> Forest plot for depression from pre-treatment to 3-month follow-up                           | 30 |
| <b>Supplementary Figure 12.</b> Forest plot for depression from pre-treatment to 6-month follow-up                           | 31 |
| <b>Supplementary Figure 13.</b> Forest plot for depression from pre-treatment to 12-month follow-up                          | 31 |
| <b>Supplementary Figure 14.</b> Forest plot for depression from pre-treatment up to 24-month follow-up                       | 32 |
| <b>Supplementary Figure 15.</b> Forest plot for anxiety from pre- to post-treatment                                          | 33 |
| <b>Supplementary Figure 16.</b> Forest plot for anxiety from pre-treatment to 3-month follow-up                              | 34 |
| <b>Supplementary Figure 17.</b> Forest plot for anxiety from pre-treatment to 6-month follow-up                              | 35 |
| <b>Supplementary Figure 18.</b> Forest plot for anxiety from pre-treatment to 12-month follow-up                             | 35 |
| <b>Supplementary Figure 19.</b> Forest plot for anxiety from pre-treatment up to 24-month follow-up                          | 36 |
| <b>Supplementary Figure 20.</b> Controlled Effects: Funnel plots for depression, a) without and b) with Trim and Fill Method | 37 |
| <b>Supplementary Figure 21.</b> Controlled Effects: Funnel plots for anxiety, a) without and b) with Trim and Fill Method    | 38 |
| <b>Additional Bayesian Analyses</b>                                                                                          | 39 |
| <b>1. Statistical Procedure</b>                                                                                              | 39 |
| <b>1.1 Forest Plots of Comparisons of TD-CBT and DS-CBT</b>                                                                  | 40 |
| <b>Supplementary Figure 22.</b> Forest plot for depression comparing TD-CBT and DS-CBT (Bayesian analyses)                   | 40 |
| <b>Supplementary Figure 23.</b> Forest plot for anxiety comparing TD-CBT and DS-CBT (Bayesian analyses)                      | 41 |
| <b>1.2 Sensitivity Analyses with Different Priors of Comparisons TD-CBT and DS-CBT</b>                                       | 42 |

- Supplementary Figure 24.** Forest plot for depression comparing TD-CBT and DS-CBT applying a non-informative uniform prior with a wide range and a Cauchy prior with a large scale 42
- Supplementary Figure 25.** Forest plot for anxiety comparing TD-CBT and DS-CBT applying a non-informative uniform prior with a wide range and a Cauchy prior with a large scale 43
- Supplementary Figure 26.** Forest plot for depression comparing TD-CBT and DS-CBT applying a weakly informative prior with a smaller distribution and a less conservative Half-Cauchy prior 44
- Supplementary Figure 27.** Forest plot for anxiety comparing TD-CBT and DS-CBT applying a weakly informative prior with a smaller distribution and a less conservative Half-Cauchy prior 45

**Supplementary Tables**

**Supplementary Table 1.** Overview of content and setup of the investigated TD-CBT protocols

| Protocol                                                 | Trans-diagnostic core construct | Theoretical Basis                                               | Number of sessions | Clinician level of training                                                    | Treatment Components / Modules |            |                         |          |                       |                    |             | Studies with Adaptations                                                                                                                             |
|----------------------------------------------------------|---------------------------------|-----------------------------------------------------------------|--------------------|--------------------------------------------------------------------------------|--------------------------------|------------|-------------------------|----------|-----------------------|--------------------|-------------|------------------------------------------------------------------------------------------------------------------------------------------------------|
|                                                          |                                 |                                                                 |                    |                                                                                | Psycho-education               | Motivation | Cognitive restructuring | Exposure | Behavioral activation | Relapse prevention | Mindfulness |                                                                                                                                                      |
| <b>Individual Setting</b>                                |                                 |                                                                 |                    |                                                                                |                                |            |                         |          |                       |                    |             |                                                                                                                                                      |
| Unified Protocol (UP) (Barlow et al., 2011)              | negative affect                 | CBT + emotion regulation                                        | 12-18              | doctoral students, post-doc fellows, licensed therapists                       | x                              | x          | x                       | x        |                       | x                  | x           | - brief version in combination with the NICE guideline for common mental health disorders (Corpas et al., 2021)<br>- ESTEEM (Pachankis et al., 2022) |
| Transdiagnostic Behavior Therapy (TBT) (Gros, 2014)      | avoidance                       | common treatment components / themes across CBT protocols       | 12                 | masters- or doctoral-level project therapists that received extensive training | x                              | x          |                         | x        |                       | x                  |             |                                                                                                                                                      |
| Emotion Regulation Therapy (ERT) (Mennin & Fresco, 2014) | emotion regulation              | mechanism-targeted CBT integrating findings from affect science | 20                 | doctoral students, post-doc fellows, licensed therapists                       | x                              |            | x                       | x        |                       | x                  | x           |                                                                                                                                                      |





|                                                                                          |               |   |                                                                                 |   |   |   |   |   |   |   |                                                                                                                                                                                                                                                   |
|------------------------------------------------------------------------------------------|---------------|---|---------------------------------------------------------------------------------|---|---|---|---|---|---|---|---------------------------------------------------------------------------------------------------------------------------------------------------------------------------------------------------------------------------------------------------|
| UP, Internet-based negative affect version (Talbure et al., 2018)                        | CBT           | 9 | specifically trained graduate students                                          | x | x | x | x | x | x | x | - 12 modules of Internet-based UP plus DBT strategies (González-Robles et al., 2020)<br>- 12/16 modules of Internet-based UP plus DBT strategies (16 module version: additional positive affect regulation strategies) (Díaz-García et al., 2021) |
| Mindfulness-Enhanced iCBT (Kladnitski et al., 2020)                                      | not specified | 6 | clinical psychologist                                                           | x |   | x | x | x | x | x | - optional additional material (sleep, assertiveness)                                                                                                                                                                                             |
| Internet-based Mindfulness Intervention for Emotional Distress (iMIED) (Li et al., 2023) | mindfulness   | 8 | integrates rationales and practices from UP and mindfulness-based interventions | x |   | x | x |   |   | x |                                                                                                                                                                                                                                                   |

---

*Note.* Several studies investigated a TD-CBT treatment that aggregated components and themes from several different CBT protocols but cannot be considered a stand-alone TD-CBT protocol (Erickson et al., 2007; Fernández-Rodríguez et al., 2022; Kunst et al., 2022; Roy-Byrne et al., 2010).



**Supplementary Table 2.** Search strings for all databases that were included in the systematic search

|                                | <b>Search string</b>                                                                                                                                                                                                                                                                                                                                                                                                                                                                                                                                                                                                                                                                                                                                                                                                                                                            |
|--------------------------------|---------------------------------------------------------------------------------------------------------------------------------------------------------------------------------------------------------------------------------------------------------------------------------------------------------------------------------------------------------------------------------------------------------------------------------------------------------------------------------------------------------------------------------------------------------------------------------------------------------------------------------------------------------------------------------------------------------------------------------------------------------------------------------------------------------------------------------------------------------------------------------|
| <b>Pubmed &amp; MEDLINE</b>    | ("transdiagnostic"[Text Word] OR "unified"[Text Word] OR "unspecific"[Text Word]) AND ("anxi*" [Text Word] OR "depress*" [Text Word] OR "emotional disorder*" [Text Word] OR "common mental health disorder*" [Text Word]) AND ("CBT"[Text Word] OR "cognitive behavioral therapy"[Text Word] OR "cognitive behavioural therapy"[Text Word] OR "cognitive behavior therapy"[Text Word] OR "cognitive behaviour therapy"[Text Word] OR "Internet-Based Intervention"[Text Word] OR "internet-based"[Text Word] OR "internetbased"[Text Word] OR "ICBT"[Text Word] OR "internet*" [Text Word] OR "web-based"[Text Word] OR "webbased"[Text Word] OR "individual"[Text Word] OR "group"[Text Word]) AND ("randomized controlled trial"[Text Word] OR "randomised controlled trial"[Text Word] OR "RCT"[Text Word] OR "control group"[Text Word] OR "control condition"[Text Word]) |
| <b>PsycINFO</b>                | TX(("transdiagnostic" OR "unified" OR "unspecific") AND ("anxi*" OR "depress*" OR "emotional disorder*" OR "common mental health disorder*") AND ("CBT" OR "cognitive behavior#ral therapy" OR "cognitive behavio#r therapy" OR "Internet-Based Intervention" OR "internet?based" OR "ICBT" OR "internet*" OR "web?based" OR "individual" OR "group")) AND ("randomi?ed controlled trial" OR "RCT" OR "control group" OR "control condition"))                                                                                                                                                                                                                                                                                                                                                                                                                                  |
| <b>Google Scholar</b>          | -                                                                                                                                                                                                                                                                                                                                                                                                                                                                                                                                                                                                                                                                                                                                                                                                                                                                               |
| <b>medRxiv (incl. bioRxiv)</b> | for term "transdiagnostic AND "common mental health disorder" AND "cognitive behavioral therapy" AND "randomized controlled trial"                                                                                                                                                                                                                                                                                                                                                                                                                                                                                                                                                                                                                                                                                                                                              |
| <b>OSF Preprints</b>           | (transdiagnostic OR unified OR unspecific) AND (anxi* OR depress* OR "emotional disorder*" OR "common mental health disorder*") AND (CBT OR "cognitive behavioral therapy" OR "cognitive behavioural therapy" OR "cognitive behavior therapy" OR "cognitive behaviour therapy" OR "internet-based intervention" OR internet-based OR "internet based" OR ICBT OR internet* OR web-based OR "web based" OR individual OR group) AND ("randomized controlled trial" OR "randomised controlled trial" OR RCT OR "control group" OR "control condition")                                                                                                                                                                                                                                                                                                                            |

**Supplementary Table 3.** Overview of reasons for exclusion for each study that was full-text screened

|                               | Reason for exclusion |                                    |                             |                                              |                    |                                                        |        |                |               |              |       | comment                                                                                              |
|-------------------------------|----------------------|------------------------------------|-----------------------------|----------------------------------------------|--------------------|--------------------------------------------------------|--------|----------------|---------------|--------------|-------|------------------------------------------------------------------------------------------------------|
|                               | secondary analysis   | no clinician-established diagnosis | different primary diagnosis | not based on trans-diagnostic CBT principles | tailored treatment | outcome measure of anxiety or depression not available | no RCT | study protocol | meta-analysis | factual text | other |                                                                                                      |
| Aghighi et al. (2022)         |                      |                                    |                             |                                              |                    | x                                                      |        |                |               |              |       |                                                                                                      |
| Aguilera-Martín et al. (2022) |                      |                                    |                             |                                              |                    |                                                        |        | x              |               |              |       |                                                                                                      |
| Alatiq (2021)                 |                      |                                    |                             |                                              |                    |                                                        | x      |                |               |              |       |                                                                                                      |
| Allen et al. (2009)           | x                    |                                    |                             |                                              |                    |                                                        |        |                |               |              |       |                                                                                                      |
| Andersen et al. (2016)        |                      |                                    |                             |                                              |                    |                                                        |        |                | x             |              |       |                                                                                                      |
| Applebaum et al. (2022)       |                      | x                                  |                             |                                              |                    |                                                        |        |                |               |              |       |                                                                                                      |
| Arai et al. (2022)            |                      |                                    |                             |                                              |                    |                                                        | x      |                |               |              |       |                                                                                                      |
| Arani et al. (2022)           |                      |                                    |                             |                                              |                    |                                                        | x      |                |               |              |       |                                                                                                      |
| Arch et al. (2012)            |                      |                                    |                             | x                                            |                    |                                                        |        |                |               |              |       | ACT is compared to traditional CBT                                                                   |
| Arch et al. (2013)            |                      |                                    |                             | x                                            |                    |                                                        |        |                |               |              |       | intervention group: mindfulness-based stress reduction, comparison was CBT - but not transdiagnostic |







|                                           |   |   |  |   |   |  |   |  |  |   |                                                                                                |  |
|-------------------------------------------|---|---|--|---|---|--|---|--|--|---|------------------------------------------------------------------------------------------------|--|
| Gros et al. (2016)                        |   |   |  |   |   |  |   |  |  | x |                                                                                                |  |
| Gros et al. (2017)                        |   |   |  |   |   |  | x |  |  |   |                                                                                                |  |
| Gros et al. (2019)                        |   |   |  |   |   |  | x |  |  |   |                                                                                                |  |
| Guliani et al. (2022)                     | x |   |  |   |   |  |   |  |  |   |                                                                                                |  |
| Gulliver et al. (2021)                    |   | x |  |   |   |  |   |  |  |   |                                                                                                |  |
| Hadjistavropoulos et al. (2020)           |   | x |  |   |   |  |   |  |  |   |                                                                                                |  |
| Hadjistavropoulos, Thiessen et al. (2020) |   | x |  |   |   |  |   |  |  |   |                                                                                                |  |
| Hagberg et al. (2023)                     |   | x |  |   |   |  |   |  |  |   |                                                                                                |  |
| Harrer et al. (2021)                      |   |   |  | x |   |  |   |  |  |   |                                                                                                |  |
| Hoiles et al. (2022)                      |   | x |  |   |   |  |   |  |  |   |                                                                                                |  |
| Hvenegaard et al. (2019)                  |   |   |  |   |   |  |   |  |  |   | focused on depression, not in line with “broad-spectrum” CBT approach of unified TD treatments |  |
| Ito et al. (2016)                         |   |   |  |   |   |  | x |  |  |   |                                                                                                |  |
| Johansson et al. (2012)                   |   |   |  |   | x |  |   |  |  |   |                                                                                                |  |
| Johnson et al. (2017)                     |   |   |  |   |   |  |   |  |  |   | not in line with “broad-spectrum” CBT approach of unified TD treatments                        |  |









|                          |   |   |  |   |  |  |   |  |  |  |                                                                                                   |                   |
|--------------------------|---|---|--|---|--|--|---|--|--|--|---------------------------------------------------------------------------------------------------|-------------------|
| Uwadiale (2022)          |   | x |  |   |  |  |   |  |  |  |                                                                                                   |                   |
| Vøllestad et al. (2011)  |   |   |  |   |  |  |   |  |  |  | mindfulness-based stress reduction                                                                |                   |
| Waite et al. (2012)      |   |   |  |   |  |  |   |  |  |  | focus on low self-esteem, not in line with “broad-spectrum” CBT approach of unified TD treatments |                   |
| Weinzimmer et al. (2022) |   |   |  |   |  |  | x |  |  |  |                                                                                                   |                   |
| Weisberg et al. (2022)   |   |   |  | x |  |  |   |  |  |  |                                                                                                   |                   |
| Weiss et al. (2015)      |   | x |  |   |  |  |   |  |  |  |                                                                                                   | main target: PTSD |
| Wetherell et al. (2009)  |   |   |  | x |  |  |   |  |  |  |                                                                                                   |                   |
| Wilner et al. (2020)     | x |   |  |   |  |  |   |  |  |  |                                                                                                   |                   |
| Woods et al. (2020)      | x |   |  |   |  |  |   |  |  |  |                                                                                                   |                   |
| Wuthrich & Rapee (2013)  |   |   |  |   |  |  |   |  |  |  | inclusion criterion: ≥ 60 years                                                                   |                   |
| Wuthrich et al. (2016)   |   |   |  |   |  |  |   |  |  |  | inclusion criterion: ≥ 60 years                                                                   |                   |
| Zabel et al. (2022)      |   |   |  |   |  |  |   |  |  |  | focus on low self-esteem, not in line with “broad-spectrum” CBT approach of unified TD treatments |                   |

**Supplementary Table 4.** Within-group effect sizes for TD treatments at pretest compared to the end of treatment and follow-up (FU) for depression and anxiety

|                    |                | Depression |                        |          |           |           |                      |          |          | Anxiety  |                        |          |           |           |                      |          |          |
|--------------------|----------------|------------|------------------------|----------|-----------|-----------|----------------------|----------|----------|----------|------------------------|----------|-----------|-----------|----------------------|----------|----------|
|                    | Setting        | <i>k</i>   | <i>d<sub>SMC</sub></i> | <i>p</i> | <i>LL</i> | <i>UL</i> | <i>F<sup>2</sup></i> | <i>Q</i> | <i>p</i> | <i>k</i> | <i>d<sub>SMC</sub></i> | <i>p</i> | <i>LL</i> | <i>UL</i> | <i>F<sup>2</sup></i> | <i>Q</i> | <i>p</i> |
| Pre to             | All            | 52         | 1.14                   | <0.001   | 1.01      | 1.28      | 84.35                | 284.5    | <0.001   | 52       | 1.08                   | <0.001   | 0.94      | 1.22      | 87.88                | 300.79   | <0.001   |
| Post-Treatment     | Individual     | 14         | 1.11                   | <0.001   | 0.88      | 1.34      | 58.65                | 35.92    | <0.001   | 14       | 1.20                   | <0.001   | 0.92      | 1.49      | 72.86                | 40.45    | <0.001   |
|                    | Group          | 19         | 1.18                   | <0.001   | 0.87      | 1.49      | 94.49                | 91.83    | <0.001   | 19       | 1.25                   | <0.001   | 0.79      | 1.70      | 97.52                | 143.77   | <0.001   |
|                    | Internet-based | 19         | 1.19                   | <0.001   | 1.00      | 1.38      | 80.79                | 113.08   | <0.001   | 19       | 1.00                   | <0.001   | 0.85      | 1.15      | 76.69                | 95.08    | <0.001   |
| Pre to 3-month FU  | All            | 28         | 1.38                   | <0.001   | 1.12      | 1.64      | 92.42                | 227.58   | <0.001   | 26       | 1.35                   | <0.001   | 1.08      | 1.62      | 93.45                | 194.62   | <0.001   |
|                    | Individual     | 6          | 1.47                   | <0.001   | 0.98      | 1.97      | 74.44                | 17.36    | 0.004    | 5        | 1.67                   | <0.001   | 0.99      | 2.35      | 82.96                | 18.71    | <0.001   |
|                    | Group          | 10         | 1.33                   | <0.001   | 0.71      | 1.95      | 97.20                | 55.30    | <0.001   | 9        | 1.65                   | <0.001   | 0.69      | 2.61      | 98.72                | 85.91    | <0.001   |
|                    | Internet-based | 12         | 1.42                   | <0.001   | 1.08      | 1.76      | 89.66                | 113.86   | <0.001   | 12       | 1.19                   | <0.001   | 0.95      | 1.43      | 83.00                | 75.45    | <0.001   |
| Pre to 6-month FU  | All            | 18         | 0.85                   | <0.001   | 0.75      | 0.94      | 32.62                | 22.98    | 0.150    | 19       | 0.91                   | <0.001   | 0.78      | 1.05      | 71.30                | 54.01    | <0.001   |
|                    | Individual     | 8          | 0.80                   | <0.001   | 0.63      | 0.98      | 45.70                | 11.33    | 0.125    | 8        | 0.92                   | <0.001   | 0.75      | 1.10      | 43.12                | 12.88    | 0.075    |
|                    | Group          | 8          | 0.89                   | <0.001   | 0.78      | 1.00      | 0.05                 | 7.18     | 0.410    | 9        | 0.88                   | <0.001   | 0.66      | 1.09      | 80.88                | 38.83    | <0.001   |
|                    | Internet-based | -          | -                      | -        | -         | -         | -                    | -        | -        | -        | -                      | -        | -         | -         | -                    | -        | -        |
| Pre to 12-month FU | All            | 10         | 1.36                   | <0.001   | 1.01      | 1.72      | 93.13                | 118.86   | <0.001   | 9        | 1.19                   | <0.001   | 0.91      | 1.48      | 91.00                | 75.94    | <0.001   |
|                    | Individual     | -          | -                      | -        | -         | -         | -                    | -        | -        | -        | -                      | -        | -         | -         | -                    | -        | -        |
|                    | Group          | 3          | 1.03                   | <0.001   | 0.53      | 1.53      | 75.08                | 8.34     | 0.015    | -        | -                      | -        | -         | -         | -                    | -        | -        |
|                    | Internet-based | 5          | 1.76                   | <0.001   | 1.31      | 2.20      | 88.57                | 35.71    | <0.001   | 5        | 1.37                   | <0.001   | 0.89      | 1.84      | 92.07                | 45.40    | <0.001   |
| Pre to 24-month FU | All            | 5          | 1.75                   | <0.001   | 1.29      | 2.21      | 93.07                | 91.78    | <0.001   | 5        | 1.47                   | <0.001   | 1.04      | 1.90      | 93.75                | 74.50    | <0.001   |
|                    | Individual     | -          | -                      | -        | -         | -         | -                    | -        | -        | -        | -                      | -        | -         | -         | -                    | -        | -        |
|                    | Group          | -          | -                      | -        | -         | -         | -                    | -        | -        | -        | -                      | -        | -         | -         | -                    | -        | -        |
|                    | Internet-based | 4          | 1.96                   | <0.001   | 1.63      | 2.29      | 72.87                | 11.84    | 0.008    | 4        | 1.62                   | <0.001   | 1.21      | 2.03      | 86.32                | 19.49    | <0.001   |

**Supplementary Table 5.** Between-group effect sizes of depressive and anxiety symptoms for transdiagnostic treatments compared to control groups at the end of treatment, excluding outliers.

|                                    |         | Depression |          |          |           |           |                      |          | Anxiety  |          |          |          |           |           |                      |          |          |
|------------------------------------|---------|------------|----------|----------|-----------|-----------|----------------------|----------|----------|----------|----------|----------|-----------|-----------|----------------------|----------|----------|
|                                    |         | <i>k</i>   | <i>g</i> | <i>p</i> | <i>LL</i> | <i>UL</i> | <i>I<sup>2</sup></i> | <i>Q</i> | <i>p</i> | <i>k</i> | <i>g</i> | <i>p</i> | <i>LL</i> | <i>UL</i> | <i>I<sup>2</sup></i> | <i>Q</i> | <i>p</i> |
| TD-CBT (all treatment formats) vs. | control | 49         | 0.63     | <0.001   | 0.53      | 0.73      | 49.82                | 96.71    | <0.001   | 39       | 0.71     | <0.001   | 0.61      | 0.81      | 33.80                | 57.41    | 0.022    |
|                                    | DS      | 9          | 0.09     | 0.269    | -0.07     | 0.25      | 53.96                | 17.82    | 0.023    | 8        | 0.08     | 0.145    | -0.03     | 0.18      | 3.79                 | 5.38     | 0.613    |
|                                    | TAU     | 16         | 0.74     | <0.001   | 0.58      | 0.9       | 48.48                | 28.07    | 0.021    | 13       | 0.71     | <0.001   | 0.53      | 0.88      | 47.85                | 22.14    | 0.036    |
|                                    | other   | 12         | 0.24     | 0.002    | 0.09      | 0.39      | 0                    | 6.50     | 0.838    | 13       | 0.14     | 0.128    | -0.04     | 0.31      | 17.67                | 15.33    | 0.224    |
|                                    | WL      | 18         | 1.00     | <0.001   | 0.81      | 1.20      | 54.03                | 37.55    | 0.003    | 17       | 0.85     | <0.001   | 0.73      | 0.97      | 0.86                 | 20.62    | 0.194    |
| Individual TD-CBT vs.              | control | 16         | 0.88     | <0.001   | 0.58      | 1.18      | 63.69                | 39.85    | <0.001   | 12       | 1.08     | <0.001   | 0.77      | 1.38      | 49.78                | 21.31    | 0.030    |
|                                    | DS      | -          | -        | -        | -         | -         | -                    | -        | -        | -        | -        | -        | -         | -         | -                    | -        | -        |
|                                    | TAU     | 4          | 1.08     | <0.001   | 0.73      | 1.43      | 0                    | 3.11     | 0.374    | 3        | 1.33     | 0.002    | 0.49      | 2.16      | 74.24                | 7.23     | 0.027    |
|                                    | other   | 5          | 0.49     | 0.011    | 0.11      | 0.86      | 25.73                | 5.99     | 0.200    | 5        | 0.25     | 0.187    | -0.12     | 0.62      | 26.40                | 5.28     | 0.259    |
|                                    | WL      | 7          | 1.40     | <0.001   | 0.87      | 1.93      | 71.24                | 23.89    | <0.001   | 6        | 1.38     | <0.001   | 0.74      | 2.02      | 77.84                | 18.05    | 0.003    |
| Group-based TD-CBT vs.             | control | 19         | 0.52     | <0.001   | 0.37      | 0.67      | 57.61                | 42.14    | 0.001    | 15       | 0.47     | <0.001   | 0.34      | 0.61      | 33.84                | 19.09    | 0.162    |
|                                    | DS      | 3          | 0.16     | 0.306    | -0.15     | 0.48      | 59.79                | 4.98     | 0.083    | 3        | 0.14     | 0.331    | -0.14     | 0.41      | 49.59                | 3.69     | 0.158    |
|                                    | TAU     | 7          | 0.75     | <0.001   | 0.43      | 1.07      | 75.36                | 18.03    | 0.006    | 7        | 0.72     | <0.001   | 0.34      | 1.10      | 83.27                | 25.84    | <0.001   |
|                                    | other   | 6          | 0.23     | 0.017    | 0.04      | 0.41      | 0.01                 | 5.50     | 0.358    | 6        | 0.07     | 0.669    | -0.24     | 0.37      | 49.27                | 9.49     | 0.091    |
|                                    | WL      | 6          | 1.14     | 0.048    | 0.01      | 2.27      | 95.76                | 27.50    | <0.001   | 6        | 1.52     | 0.033    | 0.12      | 2.92      | 96.85                | 66.10    | <0.001   |
| Internet-based TD-CBT vs.          | control | 17         | 0.69     | <0.001   | 0.54      | 0.84      | 52.20                | 34.10    | 0.005    | 15       | 0.66     | <0.001   | 0.51      | 0.82      | 43.10                | 25.26    | 0.032    |
|                                    | DS      | 4          | 0.08     | 0.563    | -0.18     | 0.33      | 70.37                | 11.37    | 0.010    | 4        | 0.03     | 0.662    | -0.11     | 0.17      | 0                    | 0.47     | 0.925    |
|                                    | TAU     | 6          | 0.79     | <0.001   | 0.46      | 1.12      | 69.03                | 15.73    | 0.008    | 6        | 0.76     | <0.001   | 0.43      | 1.09      | 69.15                | 16.09    | 0.007    |
|                                    | other   | -          | -        | -        | -         | -         | -                    | -        | -        | -        | -        | -        | -         | -         | -                    | -        | -        |
|                                    | WL      | 9          | 0.86     | <0.001   | 0.72      | 1.01      | 0                    | 7.89     | 0.444    | 9        | 0.83     | <0.001   | 0.66      | 1.00      | 20.87                | 11.07    | 0.198    |

**Supplementary Table 6.** Between-group effect sizes of depressive and anxiety symptoms for transdiagnostic treatments compared to control groups at follow-up, excluding outliers.

|                |                                                                                        |         | Depression |          |          |           |           |                       |          |          | Anxiety  |          |          |           |           |                       |          |          |
|----------------|----------------------------------------------------------------------------------------|---------|------------|----------|----------|-----------|-----------|-----------------------|----------|----------|----------|----------|----------|-----------|-----------|-----------------------|----------|----------|
|                |                                                                                        |         | <i>k</i>   | <i>g</i> | <i>p</i> | <i>LL</i> | <i>UL</i> | <i>F</i> <sup>2</sup> | <i>Q</i> | <i>p</i> | <i>k</i> | <i>g</i> | <i>p</i> | <i>LL</i> | <i>UL</i> | <i>F</i> <sup>2</sup> | <i>Q</i> | <i>p</i> |
| 3-month<br>FU  | TD-CBT (all<br>treatment<br>formats) vs.                                               | control | 21         | 0.34     | <0.001   | 0.23      | 0.45      | 33.57                 | 30.02    | 0.069    | 20       | 0.25     | 0.002    | 0.10      | 0.41      | 65.48                 | 51.69    | <0.001   |
|                |                                                                                        | DS-CBT  | 5          | 0.11     | 0.376    | -0.14     | 0.37      | 77.81                 | 15.73    | 0.003    | 5        | -0.01    | 0.912    | -0.18     | 0.16      | 52.62                 | 8.48     | 0.075    |
|                |                                                                                        | TAU     | 6          | 0.42     | <0.001   | 0.26      | 0.59      | 6.45                  | 6.77     | 0.238    | 4        | 0.49     | <0.001   | 0.22      | 0.76      | 51.43                 | 6.23     | 0.101    |
|                |                                                                                        | other   | 9          | 0.23     | 0.019    | 0.04      | 0.42      | 20.26                 | 9.11     | 0.333    | 8        | 0.24     | 0.009    | 0.06      | 0.42      | 0                     | 9.69     | 0.207    |
|                |                                                                                        | WL      | 6          | 1.23     | <0.001   | 0.52      | 1.94      | 88.67                 | 35.76    | <0.001   | 5        | 1.16     | 0.014    | 0.23      | 2.09      | 90.47                 | 39.86    | <0.001   |
|                | Individual TD-<br>CBT vs.<br>Group-based<br>TD-CBT vs.<br>Internet-based<br>TD-CBT vs. | control | 7          | 1.12     | <0.001   | 0.48      | 1.77      | 86.76                 | 32.19    | <0.001   | 4        | 2.3      | <0.001   | 1.27      | 3.33      | 77.67                 | 12.3     | 0.006    |
|                |                                                                                        | control | 11         | 0.28     | <0.001   | 0.14      | 0.42      | 22.82                 | 15.95    | 0.101    | 10       | 0.42     | <0.001   | 0.20      | 0.65      | 61.8                  | 22.45    | 0.008    |
|                |                                                                                        | control | 9          | 0.18     | 0.126    | -0.05     | 0.42      | 73.17                 | 27.64    | <0.001   | 9        | -0.05    | 0.409    | -0.17     | 0.07      | 2.55                  | 7.89     | 0.444    |
|                |                                                                                        | control | 16         | 0.19     | <0.001   | 0.09      | 0.28      | 11.22                 | 18.92    | 0.217    | 18       | 0.21     | <0.001   | 0.1       | 0.32      | 31.92                 | 24.72    | 0.101    |
|                |                                                                                        | control | 3          | -0.01    | 0.937    | -0.23     | 0.21      | 39.89                 | 3.28     | 0.194    | 3        | 0.04     | 0.650    | -0.15     | 0.24      | 22.99                 | 2.33     | 0.312    |
| 6-month<br>FU  | TD-CBT (all<br>treatment<br>formats) vs.                                               | TAU     | 4          | 0.26     | <0.001   | 0.15      | 0.38      | 0                     | 0.74     | 0.864    | 4        | 0.32     | 0.001    | 0.13      | 0.52      | 47.22                 | 5.67     | 0.129    |
|                |                                                                                        | other   | 7          | 0.15     | 0.162    | -0.06     | 0.37      | 10.92                 | 6.13     | 0.409    | 8        | 0.19     | 0.050    | 0         | 0.38      | 0                     | 6.19     | 0.518    |
|                |                                                                                        | WL      | 3          | 0.63     | 0.019    | 0.1       | 1.15      | 47.71                 | 3.82     | 0.148    | 4        | 0.62     | 0.065    | -0.04     | 1.27      | 77.44                 | 11.9     | 0.008    |
|                |                                                                                        | control | 9          | 0.24     | 0.012    | 0.05      | 0.43      | 44.45                 | 14.07    | 0.080    | 9        | 0.26     | <0.001   | 0.15      | 0.36      | 0.01                  | 9.4      | 0.309    |
|                |                                                                                        | control | 8          | 0.16     | 0.033    | 0.01      | 0.31      | 16.49                 | 9.45     | 0.222    | 9        | 0.17     | 0.065    | -0.01     | 0.36      | 46.53                 | 14.41    | 0.072    |
|                | Individual TD-<br>CBT vs.<br>Group-based<br>TD-CBT vs.<br>Internet-based<br>TD-CBT vs. | control | -          | -        | -        | -         | -         | -                     | -        | -        | -        | -        | -        | -         | -         | -                     | -        | -        |
|                |                                                                                        | control | 10         | 0.30     | <0.001   | 0.22      | 0.39      | 0                     | 3.71     | 0.930    | 11       | 0.22     | <0.001   | 0.12      | 0.32      | 24.83                 | 10.52    | 0.396    |
|                |                                                                                        | DS-CBT  | 4          | 0.13     | 0.247    | -0.09     | 0.36      | 58.91                 | 7.48     | 0.058    | 4        | 0.08     | 0.253    | -0.06     | 0.23      | 0                     | 0.87     | 0.832    |
|                |                                                                                        | TAU     | 4          | 0.35     | <0.001   | 0.24      | 0.47      | 0                     | 0.30     | 0.960    | 4        | 0.36     | <0.001   | 0.24      | 0.48      | 0                     | 0.70     | 0.872    |
|                |                                                                                        | other   | 3          | 0.23     | 0.030    | 0.02      | 0.44      | 0                     | 0.03     | 0.985    | 3        | 0.21     | 0.044    | 0.01      | 0.42      | 0                     | 0.10     | 0.950    |
| 12-month<br>FU | TD-CBT (all<br>treatment<br>formats) vs.                                               | WL      | -          | -        | -        | -         | -         | -                     | -        | -        | -        | -        | -        | -         | -         | -                     | -        |          |
|                |                                                                                        | control | 3          | 0.33     | <0.001   | 0.21      | 0.45      | 0                     | 0.58     | 0.748    | 3        | 0.34     | <0.001   | 0.20      | 0.47      | 9.71                  | 1.67     | 0.434    |

|             |                                                  |                        |         |      |       |       |      |       |       |       |   |      |       |       |      |       |      |       |   |
|-------------|--------------------------------------------------|------------------------|---------|------|-------|-------|------|-------|-------|-------|---|------|-------|-------|------|-------|------|-------|---|
|             | Group-based TD-CBT vs. Internet-based TD-CBT vs. | control                | 3       | 0.30 | 0.006 | 0.09  | 0.50 | 0     | 0.59  | 0.744 | 3 | 0.27 | 0.012 | 0.06  | 0.48 | 0     | 0.24 | 0.888 |   |
|             | TD-CBT vs.                                       | control                | 5       | 0.17 | 0.098 | -0.03 | 0.38 | 54.63 | 8.93  | 0.063 | 5 | 0.11 | 0.116 | -0.03 | 0.24 | 0     | 1.95 | 0.746 |   |
| 24-month FU | TD-CBT (all treatment formats) vs.               | control                | 5       | 0.20 | 0.111 | -0.05 | 0.46 | 80.63 | 16.44 | 0.002 | 5 | 0.14 | 0.092 | -0.02 | 0.31 | 56.46 | 8.63 | 0.071 |   |
|             |                                                  | DS-CBT                 | 4       | 0.20 | 0.259 | -0.14 | 0.54 | 81.90 | 16.15 | 0.001 | 4 | 0.11 | 0.344 | -0.12 | 0.35 | 62.33 | 8.25 | 0.041 |   |
|             |                                                  | TAU                    | -       | -    | -     | -     | -    | -     | -     | -     | - | -    | -     | -     | -    | -     | -    | -     |   |
|             |                                                  | other                  | -       | -    | -     | -     | -    | -     | -     | -     | - | -    | -     | -     | -    | -     | -    | -     |   |
|             |                                                  | WL                     | -       | -    | -     | -     | -    | -     | -     | -     | - | -    | -     | -     | -    | -     | -    | -     |   |
|             |                                                  | Individual TD-CBT vs.  | control | -    | -     | -     | -    | -     | -     | -     | - | -    | -     | -     | -    | -     | -    | -     | - |
|             |                                                  | Group-based TD-CBT vs. | control | -    | -     | -     | -    | -     | -     | -     | - | -    | -     | -     | -    | -     | -    | -     | - |
|             | Internet-based TD-CBT vs.                        | control                | 4       | 0.20 | 0.259 | -0.14 | 0.54 | 81.9  | 16.15 | 0.001 | 4 | 0.11 | 0.344 | -0.12 | 0.35 | 62.33 | 8.25 | 0.041 |   |

**Supplementary Table 7.** Within-group effect sizes for TD treatments at pretest compared to the end of treatment and follow-up (FU) for depression and anxiety applying 0.3 as a correlation

|            | TD-CBT Setting | Depression |                        |          |           |           |                      |          |          | Anxiety  |                        |          |           |           |                      |          |          |
|------------|----------------|------------|------------------------|----------|-----------|-----------|----------------------|----------|----------|----------|------------------------|----------|-----------|-----------|----------------------|----------|----------|
|            |                | <i>k</i>   | <i>d<sub>SMC</sub></i> | <i>p</i> | <i>LL</i> | <i>UL</i> | <i>F<sup>2</sup></i> | <i>Q</i> | <i>p</i> | <i>k</i> | <i>d<sub>SMC</sub></i> | <i>p</i> | <i>LL</i> | <i>UL</i> | <i>F<sup>2</sup></i> | <i>Q</i> | <i>p</i> |
| Pre to     | All            | 52         | 1.14                   | <0.001   | 1.01      | 1.27      | 83.75                | 279.75   | <0.001   | 52       | 1.07                   | <0.001   | 0.93      | 1.21      | 87.25                | 296.21   | <0.001   |
| Post-      | Individual     | 14         | 1.11                   | <0.001   | 0.87      | 1.34      | 57.60                | 35.24    | <0.001   | 14       | 1.20                   | <0.001   | 0.91      | 1.49      | 72.30                | 39.86    | <0.001   |
| Treatment  | Group          | 19         | 1.17                   | <0.001   | 0.86      | 1.47      | 94.14                | 87.52    | <0.001   | 19       | 1.24                   | <0.001   | 0.79      | 1.70      | 97.46                | 140.17   | <0.001   |
|            | Internet-based | 19         | 1.19                   | <0.001   | 1.00      | 1.38      | 80.75                | 112.91   | <0.001   | 19       | 1.00                   | <0.001   | 0.85      | 1.15      | 76.57                | 94.69    | <0.001   |
| Pre to 3-  | All            | 28         | 1.38                   | <0.001   | 1.12      | 1.64      | 92.26                | 225.81   | <0.001   | 26       | 1.35                   | <0.001   | 1.08      | 1.62      | 93.29                | 193.19   | <0.001   |
| month FU   | Individual     | 6          | 1.48                   | <0.001   | 0.98      | 1.98      | 73.42                | 17.34    | 0.004    | 5        | 1.67                   | <0.001   | 0.99      | 2.36      | 81.89                | 18.71    | <0.001   |
|            | Group          | 10         | 1.33                   | <0.001   | 0.71      | 1.95      | 97.10                | 53.81    | <0.001   | 9        | 1.65                   | <0.001   | 0.69      | 2.60      | 98.71                | 84.36    | <0.001   |
|            | Internet-based | 12         | 1.42                   | <0.001   | 1.08      | 1.76      | 89.66                | 113.86   | <0.001   | 12       | 1.19                   | <0.001   | 0.95      | 1.43      | 83.00                | 75.45    | <0.001   |
| Pre to 6-  | All            | 18         | 0.84                   | <0.001   | 0.75      | 0.94      | 32.56                | 22.84    | 0.155    | 19       | 0.91                   | <0.001   | 0.78      | 1.05      | 70.32                | 53.59    | <0.001   |
| month FU   | Individual     | 8          | 0.80                   | <0.001   | 0.62      | 0.98      | 44.43                | 11.02    | 0.138    | 8        | 0.93                   | <0.001   | 0.75      | 1.10      | 41.73                | 12.41    | 0.088    |
|            | Group          | 8          | 0.89                   | <0.001   | 0.78      | 1.00      | 9.39                 | 7.18     | 0.410    | 9        | 0.88                   | <0.001   | 0.66      | 1.09      | 80.88                | 38.83    | <0.001   |
|            | Internet-based | -          | -                      | -        | -         | -         | -                    | -        | -        | -        | -                      | -        | -         | -         | -                    | -        | -        |
| Pre to 12- | All            | 10         | 1.37                   | <0.001   | 1.02      | 1.72      | 92.48                | 112.31   | <0.001   | 9        | 1.19                   | <0.001   | 0.91      | 1.48      | 90.20                | 70.54    | <0.001   |
| month FU   | Individual     | -          | -                      | -        | -         | -         | -                    | -        | -        | -        | -                      | -        | -         | -         | -                    | -        | -        |
|            | Group          | 3          | 1.05                   | <0.001   | 0.56      | 1.54      | 71.60                | 7.16     | 0.028    | -        | -                      | -        | -         | -         | -                    | -        | -        |
|            | Internet-based | 5          | 1.76                   | <0.001   | 1.32      | 2.20      | 87.58                | 29.84    | <0.001   | 5        | 1.37                   | <0.001   | 0.90      | 1.84      | 91.44                | 38.55    | <0.001   |
| Pre to 24- | All            | 5          | 1.75                   | <0.001   | 1.29      | 2.21      | 92.76                | 85.53    | <0.001   | 5        | 1.47                   | <0.001   | 1.04      | 1.90      | 93.44                | 69.57    | <0.001   |
| month FU   | Individual     | -          | -                      | -        | -         | -         | -                    | -        | -        | -        | -                      | -        | -         | -         | -                    | -        | -        |
|            | Group          | -          | -                      | -        | -         | -         | -                    | -        | -        | -        | -                      | -        | -         | -         | -                    | -        | -        |
|            | Internet-based | 4          | 1.96                   | <0.001   | 1.63      | 2.29      | 72.87                | 11.84    | 0.008    | 4        | 1.62                   | <0.001   | 1.21      | 2.03      | 86.32                | 19.49    | <0.001   |

**Supplementary Table 8.** Within-group effect sizes for TD treatments at pretest compared to the end of treatment and follow-up (FU) for depression and anxiety applying 0.7 as a correlation

|            | TD-CBT Setting | Depression |                        |          |           |           |                      |          |          | Anxiety  |                        |          |           |           |                      |          |          |
|------------|----------------|------------|------------------------|----------|-----------|-----------|----------------------|----------|----------|----------|------------------------|----------|-----------|-----------|----------------------|----------|----------|
|            |                | <i>k</i>   | <i>d<sub>SMC</sub></i> | <i>p</i> | <i>LL</i> | <i>UL</i> | <i>I<sup>2</sup></i> | <i>Q</i> | <i>p</i> | <i>k</i> | <i>d<sub>SMC</sub></i> | <i>p</i> | <i>LL</i> | <i>UL</i> | <i>I<sup>2</sup></i> | <i>Q</i> | <i>p</i> |
| Pre to     | All            | 52         | 1.15                   | <0.001   | 1.02      | 1.28      | 85.10                | 290.68   | <0.001   | 52       | 1.09                   | <0.001   | 0.94      | 1.23      | 88.54                | 306.39   | <0.001   |
| Post-      | Individual     | 14         | 1.11                   | <0.001   | 0.88      | 1.35      | 60.17                | 36.83    | <0.001   | 14       | 1.20                   | <0.001   | 0.92      | 1.49      | 73.68                | 41.31    | <0.001   |
| Treatment  | Group          | 19         | 1.18                   | <0.001   | 0.87      | 1.50      | 94.87                | 97.21    | <0.001   | 19       | 1.25                   | <0.001   | 0.79      | 1.71      | 97.58                | 147.90   | <0.001   |
|            | Internet-based | 19         | 1.19                   | <0.001   | 1.01      | 1.38      | 80.86                | 113.33   | <0.001   | 19       | 1.00                   | <0.001   | 0.85      | 1.16      | 76.87                | 95.68    | <0.001   |
| Pre to 3-  | All            | 28         | 1.38                   | <0.001   | 1.12      | 1.64      | 92.66                | 229.96   | <0.001   | 26       | 1.35                   | <0.001   | 1.08      | 1.63      | 93.62                | 196.25   | <0.001   |
| month FU   | Individual     | 6          | 1.47                   | <0.001   | 0.98      | 1.96      | 75.83                | 17.38    | 0.004    | 5        | 1.67                   | <0.001   | 0.99      | 2.34      | 84.33                | 18.72    | <0.001   |
|            | Group          | 10         | 1.33                   | <0.001   | 0.71      | 1.96      | 97.34                | 57.01    | <0.001   | 9        | 1.65                   | <0.001   | 0.69      | 2.61      | 98.73                | 87.65    | <0.001   |
|            | Internet-based | 12         | 1.42                   | <0.001   | 1.08      | 1.76      | 89.66                | 113.86   | <0.001   | 12       | 1.19                   | <0.001   | 0.95      | 1.43      | 83.00                | 75.45    | <0.001   |
| Pre to 6-  | All            | 18         | 0.85                   | <0.001   | 0.76      | 0.94      | 32.78                | 23.21    | 0.143    | 19       | 0.91                   | <0.001   | 0.78      | 1.05      | 72.71                | 54.67    | <0.001   |
| month FU   | Individual     | 8          | 0.81                   | <0.001   | 0.64      | 0.98      | 47.71                | 11.75    | 0.109    | 8        | 0.92                   | <0.001   | 0.76      | 1.09      | 45.42                | 13.55    | 0.060    |
|            | Group          | 8          | 0.89                   | <0.001   | 0.78      | 1.00      | 9.39                 | 7.18     | 0.410    | 9        | 0.88                   | <0.001   | 0.66      | 1.09      | 80.88                | 38.83    | <0.001   |
|            | Internet-based | -          | -                      | -        | -         | -         | -                    | -        | -        | -        | -                      | -        | -         | -         | -                    | -        | -        |
| Pre to 12- | All            | 10         | 1.36                   | <0.001   | 1.00      | 1.71      | 93.95                | 127.69   | <0.001   | 9        | 1.19                   | <0.001   | 0.90      | 1.48      | 92.01                | 84.00    | <0.001   |
| month FU   | Individual     | -          | -                      | -        | -         | -         | -                    | -        | -        | -        | -                      | -        | -         | -         | -                    | -        | -        |
|            | Group          | 3          | 1.01                   | <0.001   | 0.51      | 1.52      | 79.15                | 10.43    | 0.005    | -        | -                      | -        | -         | -         | -                    | -        | -        |
|            | Internet-based | 5          | 1.75                   | <0.001   | 1.30      | 2.20      | 89.69                | 45.06    | <0.001   | 5        | 1.36                   | <0.001   | 0.88      | 1.84      | 92.90                | 57.54    | <0.001   |
| Pre to 24- | All            | 5          | 1.75                   | <0.001   | 1.29      | 2.21      | 93.40                | 99.20    | <0.001   | 5        | 1.47                   | <0.001   | 1.04      | 1.90      | 94.08                | 80.49    | <0.001   |
| month FU   | Individual     | -          | -                      | -        | -         | -         | -                    | -        | -        | -        | -                      | -        | -         | -         | -                    | -        | -        |
|            | Group          | -          | -                      | -        | -         | -         | -                    | -        | -        | -        | -                      | -        | -         | -         | -                    | -        | -        |
|            | Internet-based | 4          | 1.96                   | <0.001   | 1.63      | 2.29      | 72.87                | 11.84    | 0.008    | 4        | 1.62                   | <0.001   | 1.21      | 2.03      | 86.32                | 19.49    | <0.001   |



Supplementary Figures

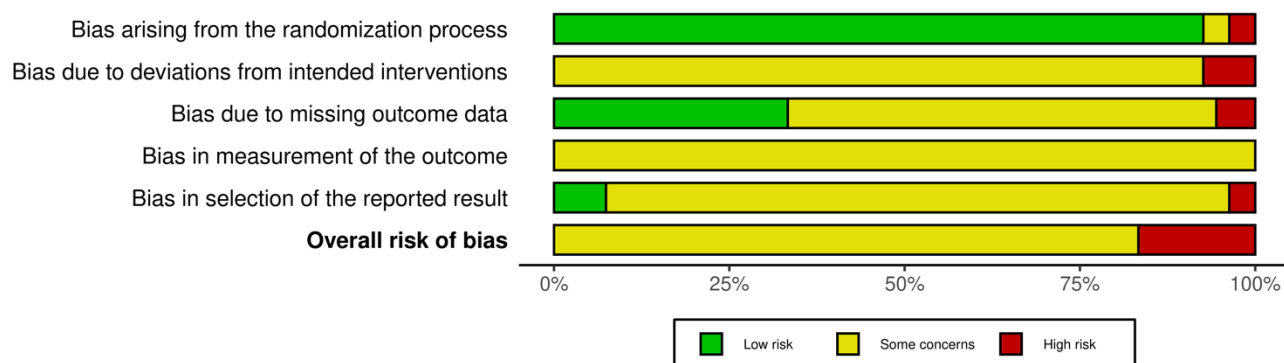

Supplementary Figure 1. Summary plot of risk of bias assessment

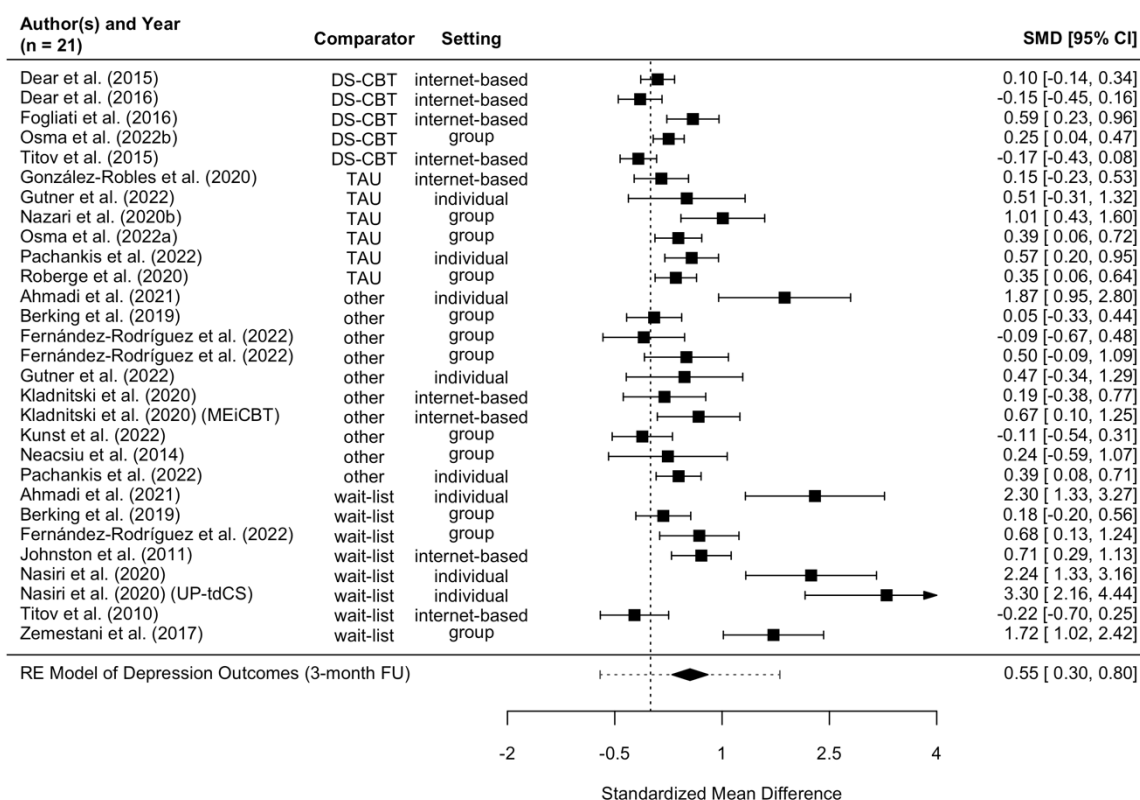

Supplementary Figure 2. Forest plot for depression comparing TD-CBT vs. controls at 3-month follow-up

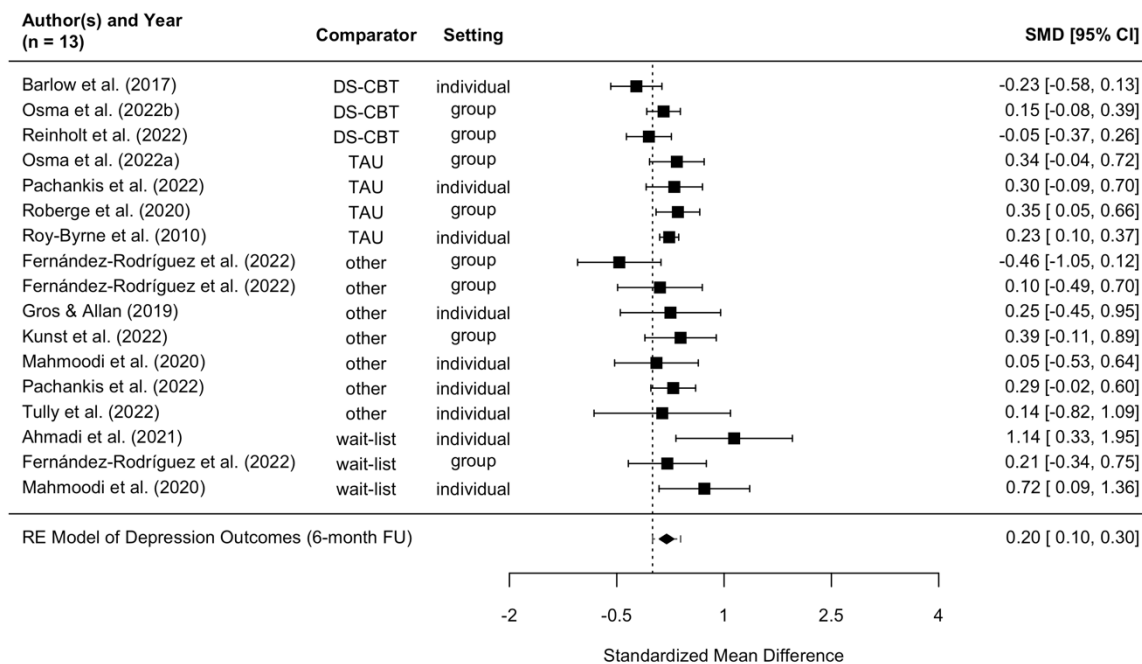

**Supplementary Figure 3.** Forest plot for depression comparing TD-CBT vs. controls at 6-month follow-up

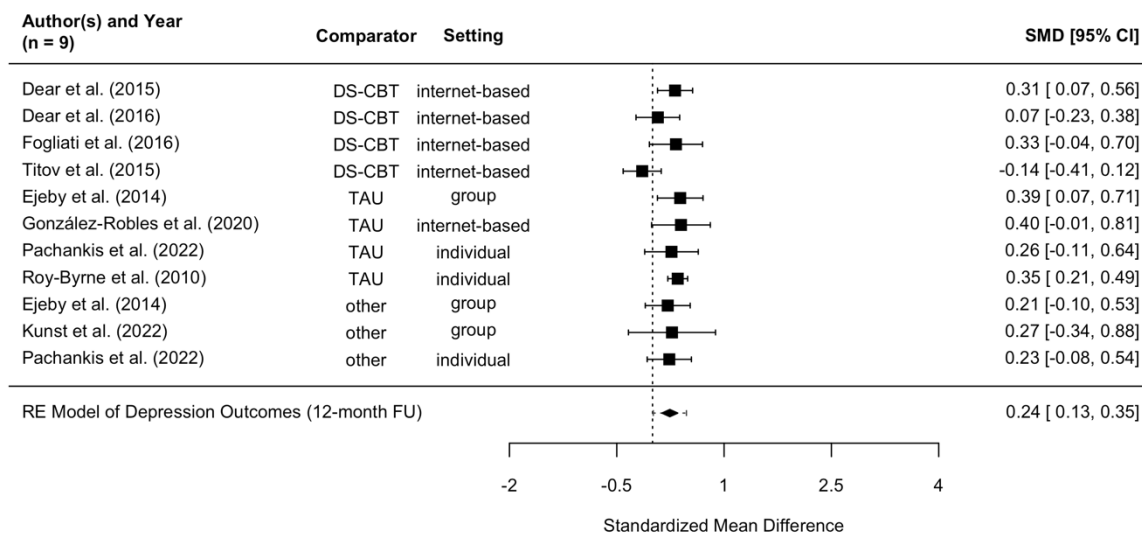

**Supplementary Figure 4.** Forest plot for depression comparing TD-CBT vs. controls at 12-month follow-up

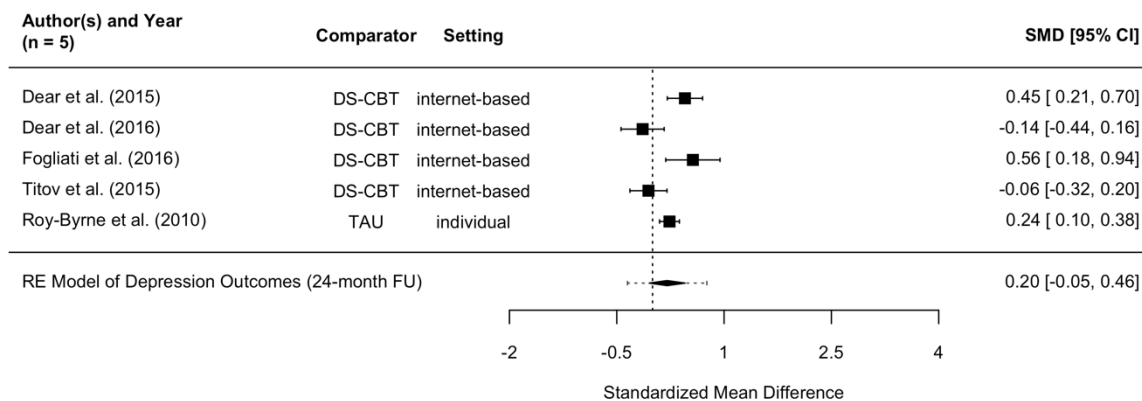

**Supplementary Figure 5.** Forest plot for depression comparing TD-CBT vs. controls at 24-month follow-up

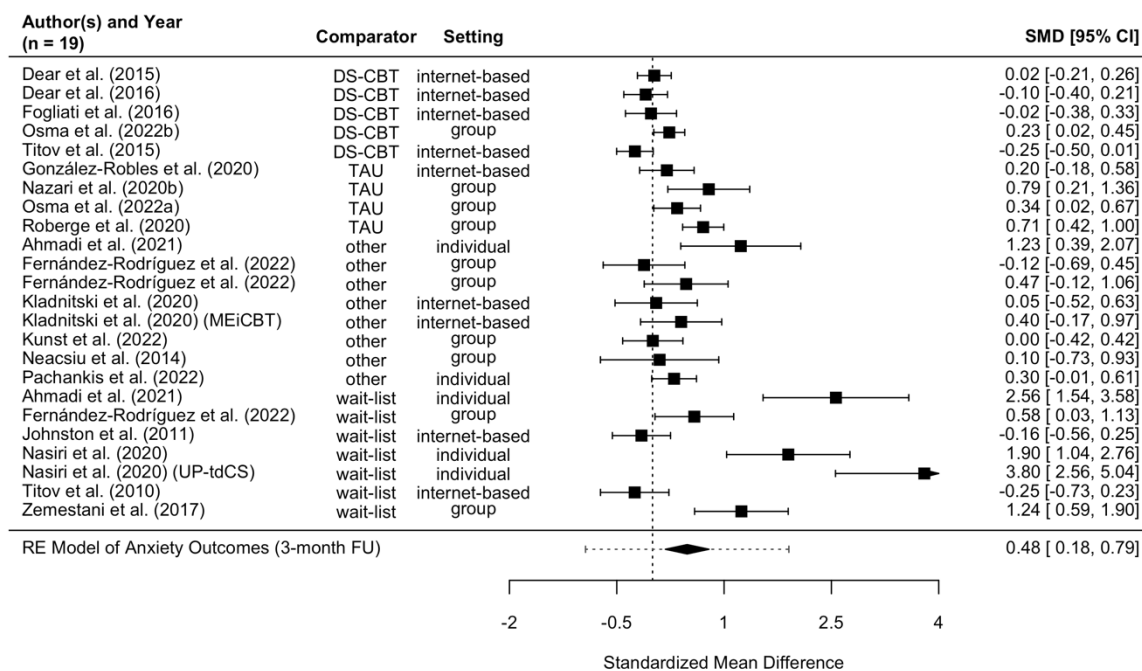

**Supplementary Figure 6.** Forest plot for anxiety comparing TD-CBT vs. controls at 3-month follow-up

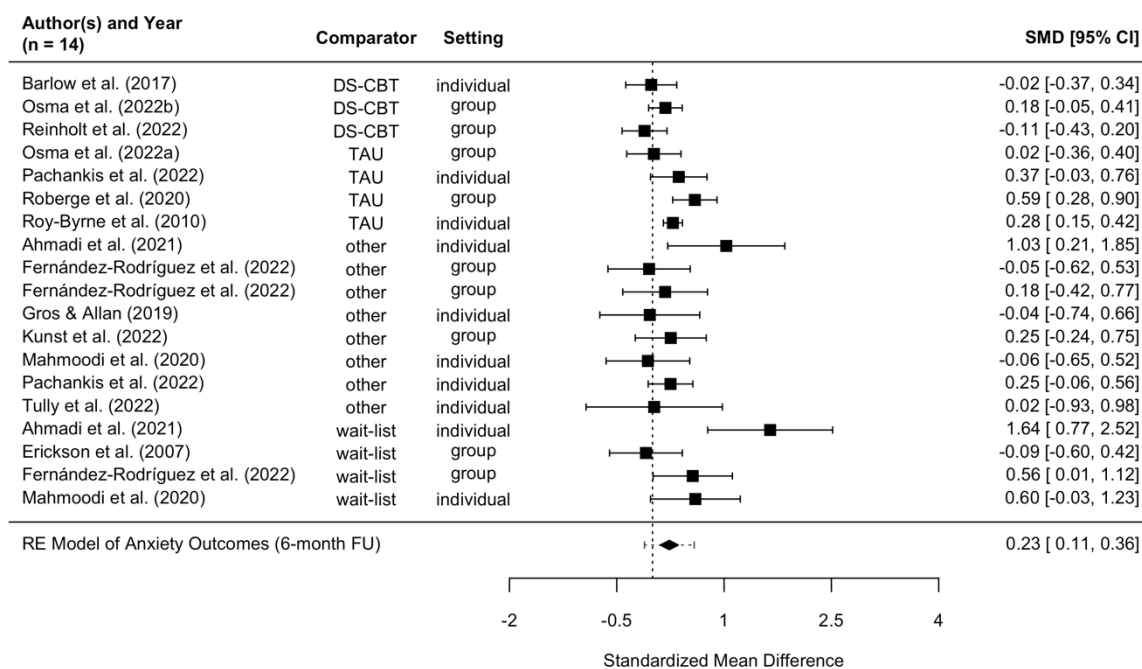

Supplementary Figure 7. Forest plot for anxiety comparing TD-CBT vs. controls at 6-month follow-up

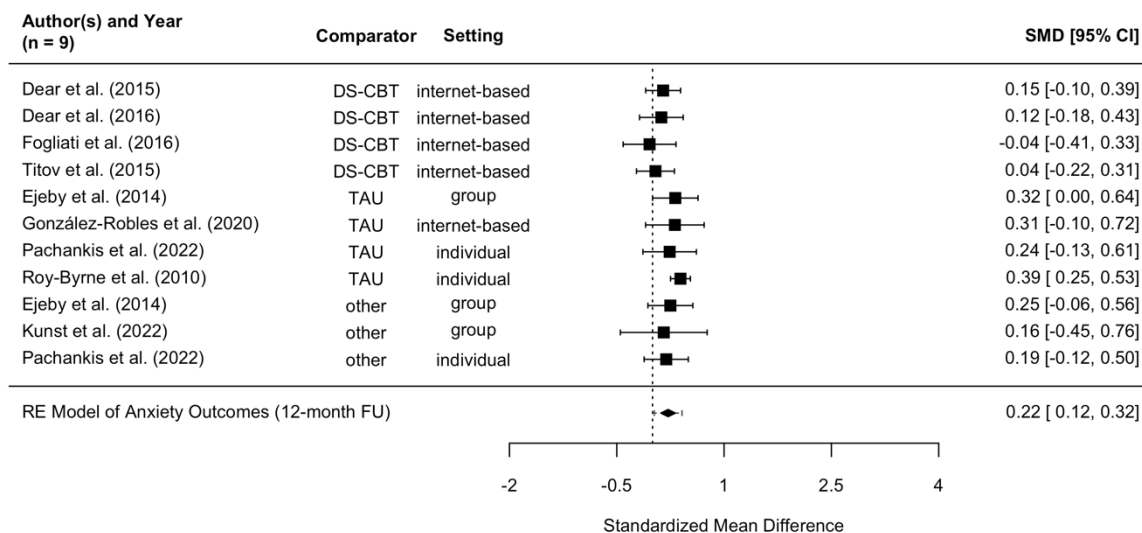

Supplementary Figure 8. Forest plot for anxiety comparing TD-CBT vs. controls at 12-month follow-up

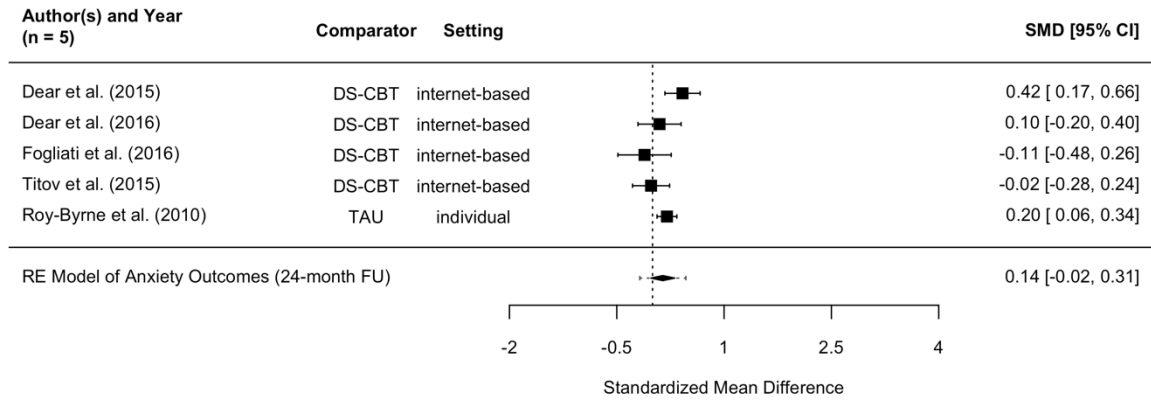

**Supplementary Figure 9.** Forest plot for anxiety comparing TD-CBT vs. controls at 24-month follow-up

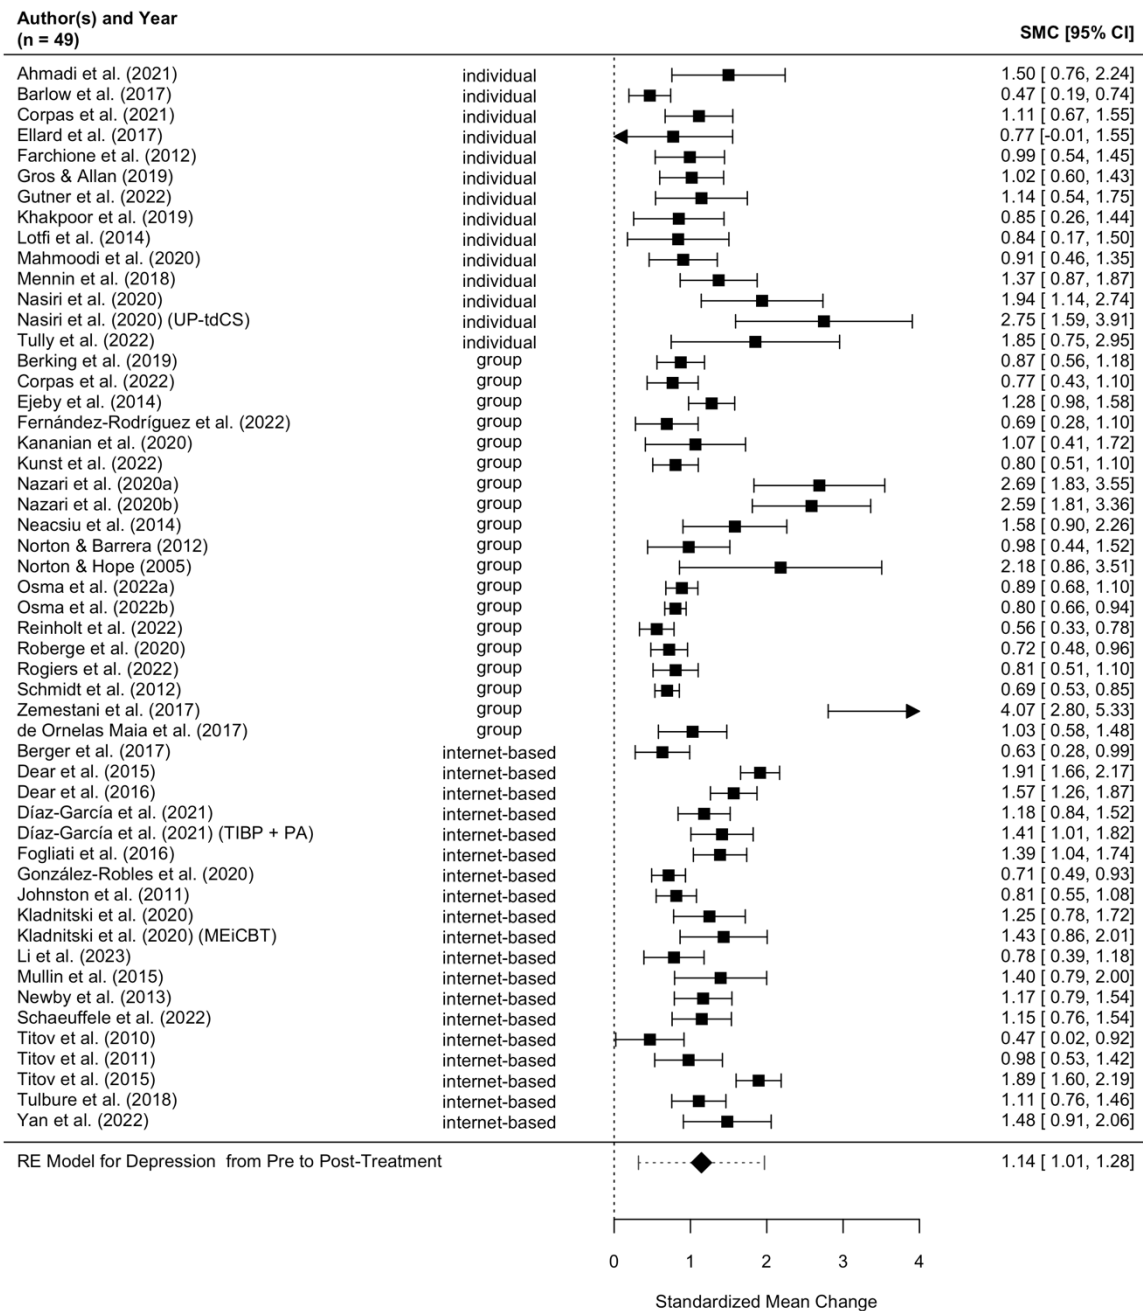

Supplementary Figure 10. Forest plot for depression from pre- to post-treatment

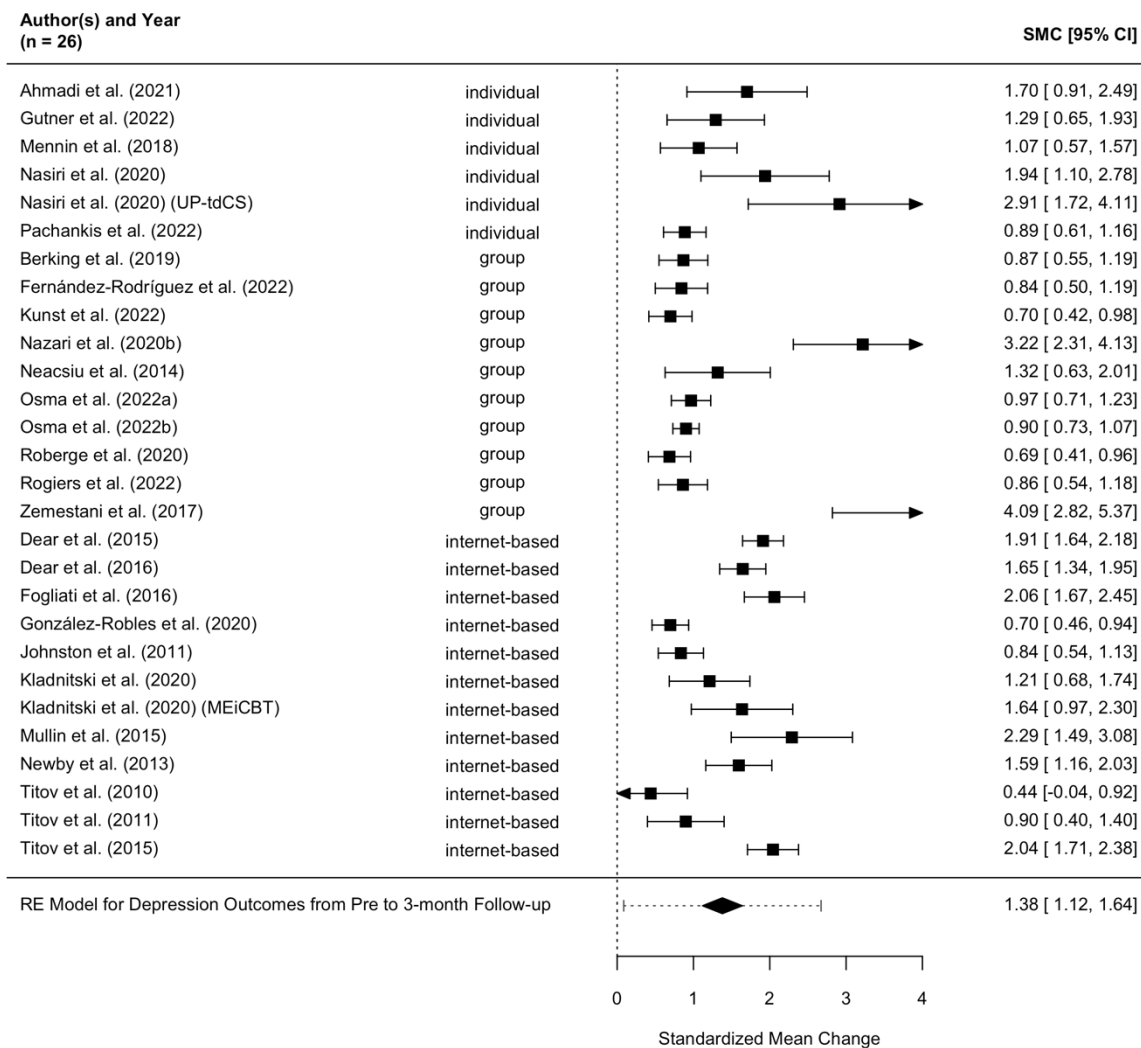

Supplementary Figure 11. Forest plot for depression from pre-treatment to 3-month follow-up

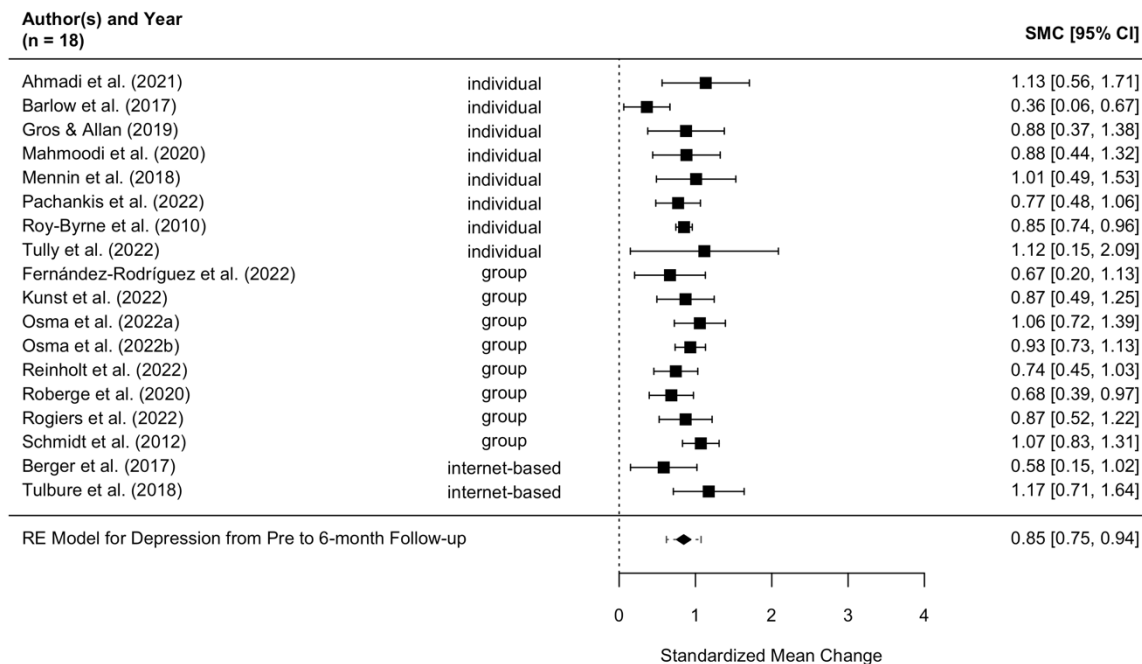

Supplementary Figure 12. Forest plot for depression from pre-treatment to 6-month follow-up

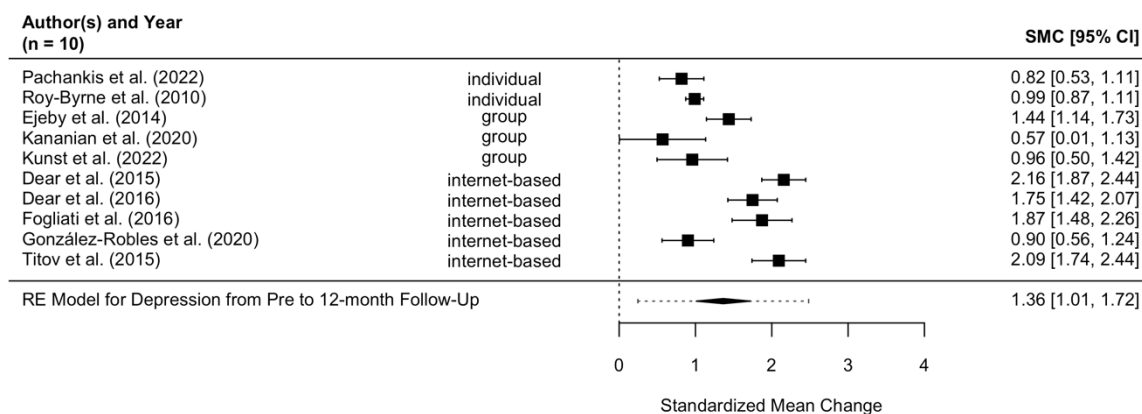

Supplementary Figure 13. Forest plot for depression from pre-treatment to 12-month follow-up



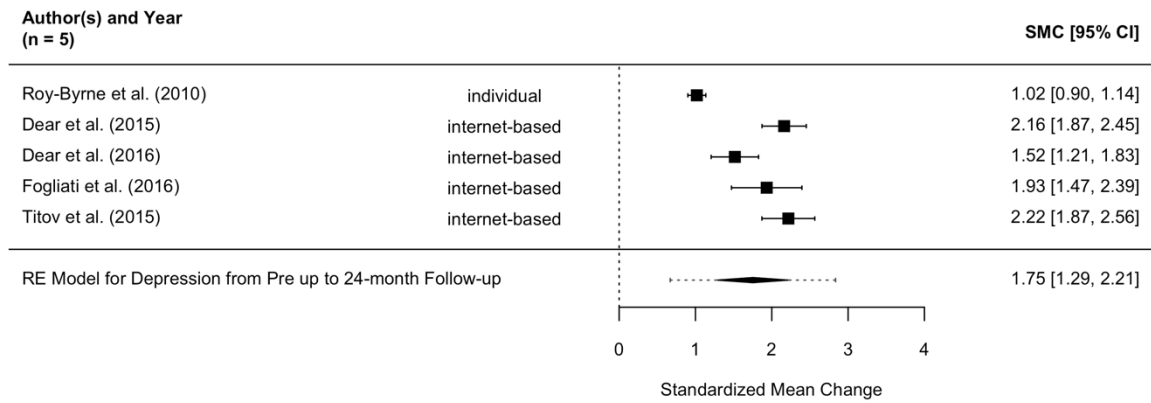

**Supplementary Figure 14.** Forest plot for depression from pre-treatment up to 24-month follow-up

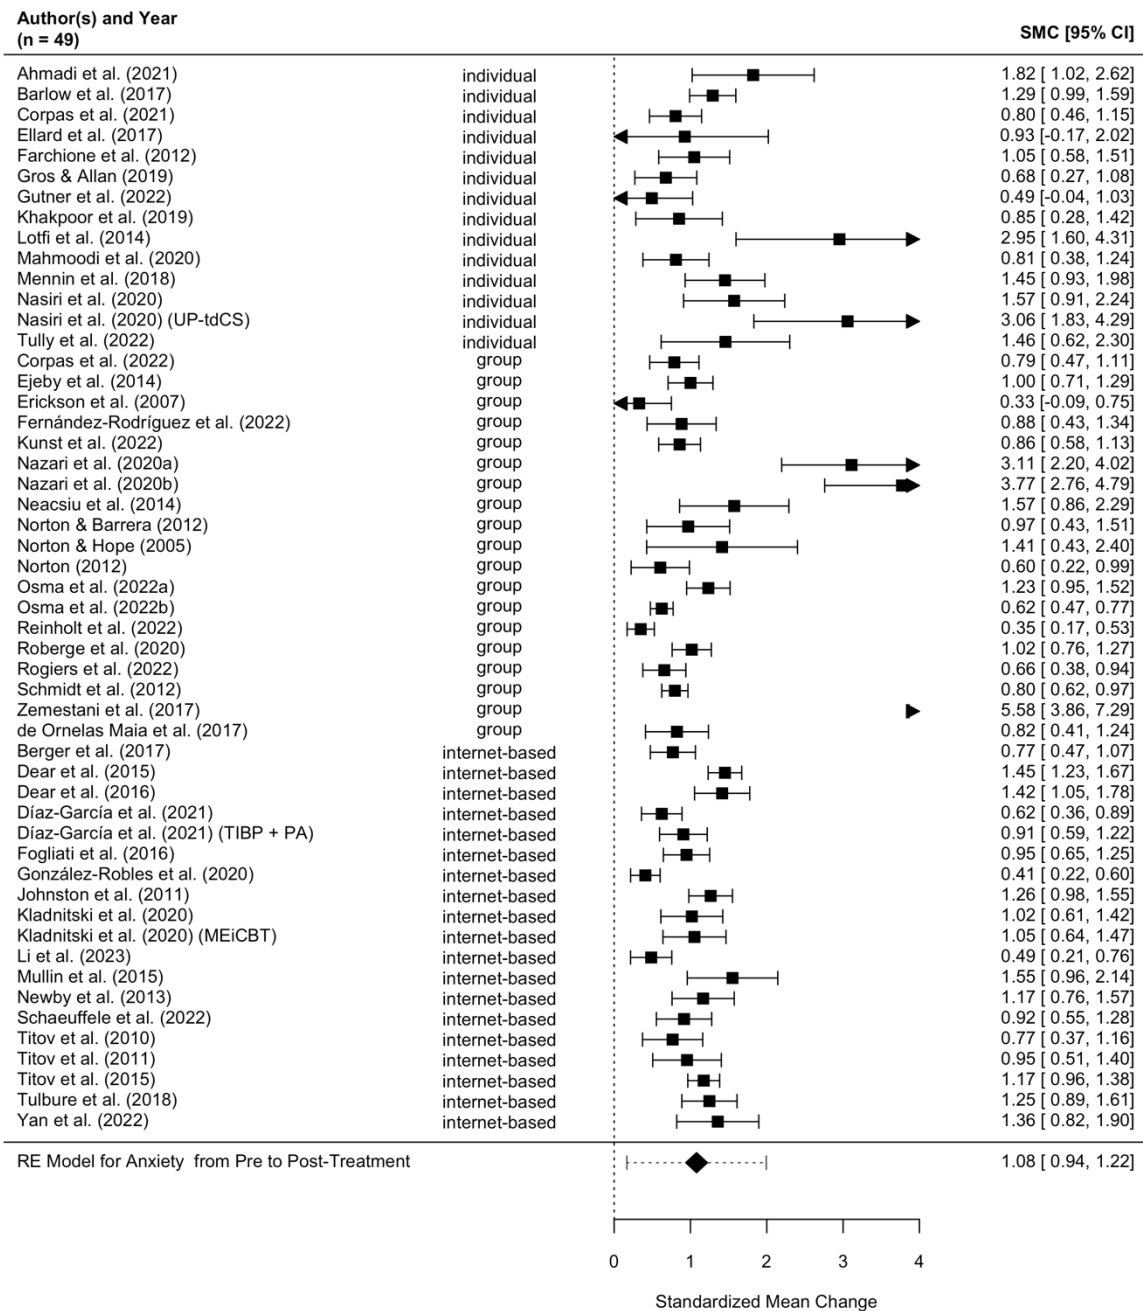

Supplementary Figure 15. Forest plot for anxiety from pre- to post-treatment

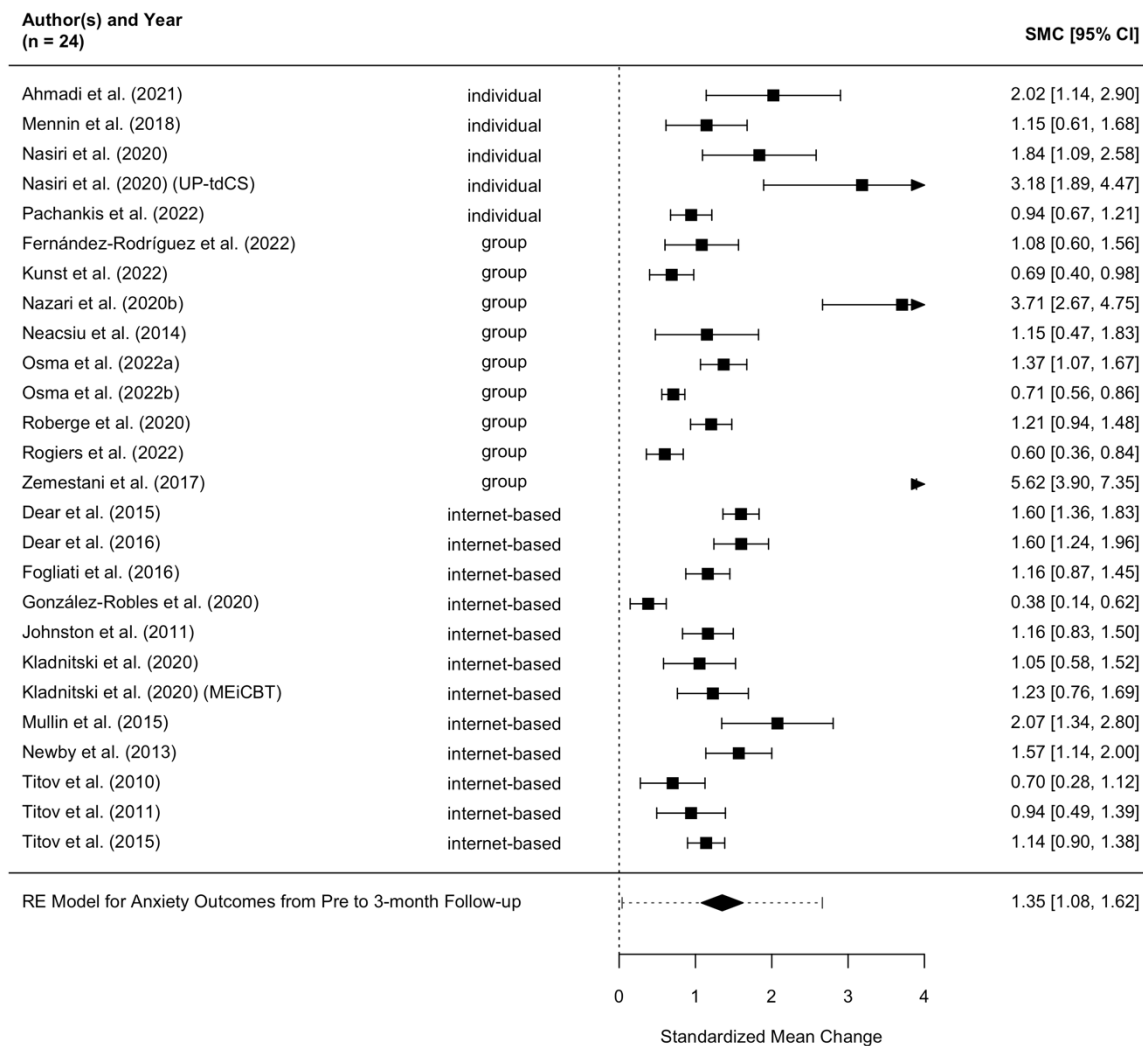

Supplementary Figure 16. Forest plot for anxiety from pre-treatment to 3-month follow-up

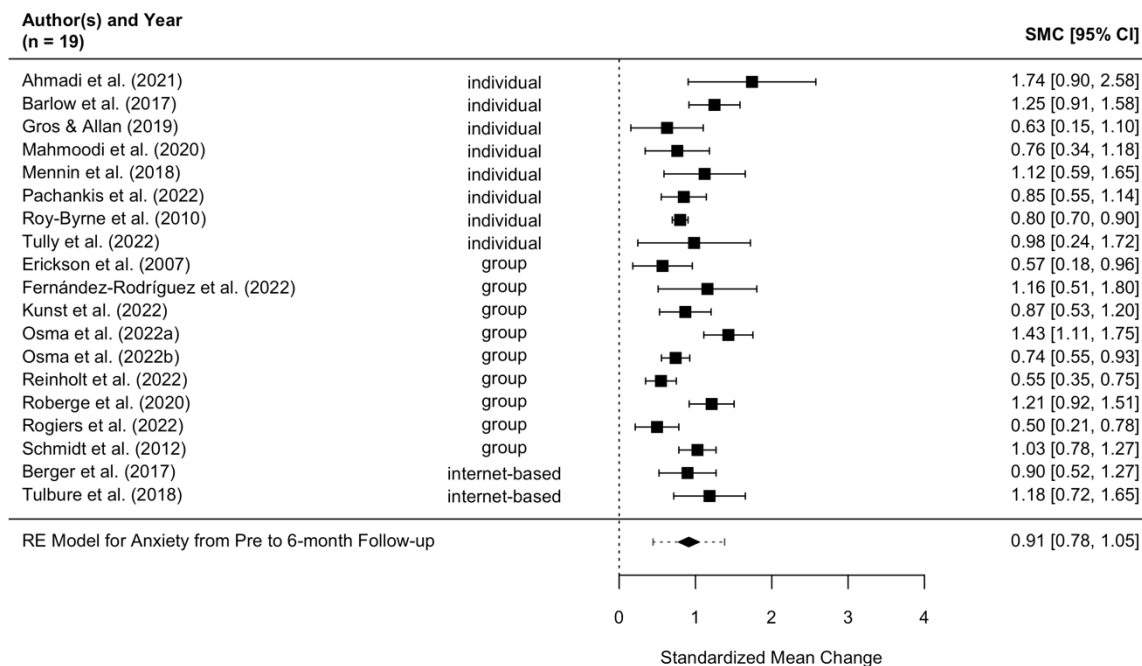

Supplementary Figure 17. Forest plot for anxiety from pre-treatment to 6-month follow-up

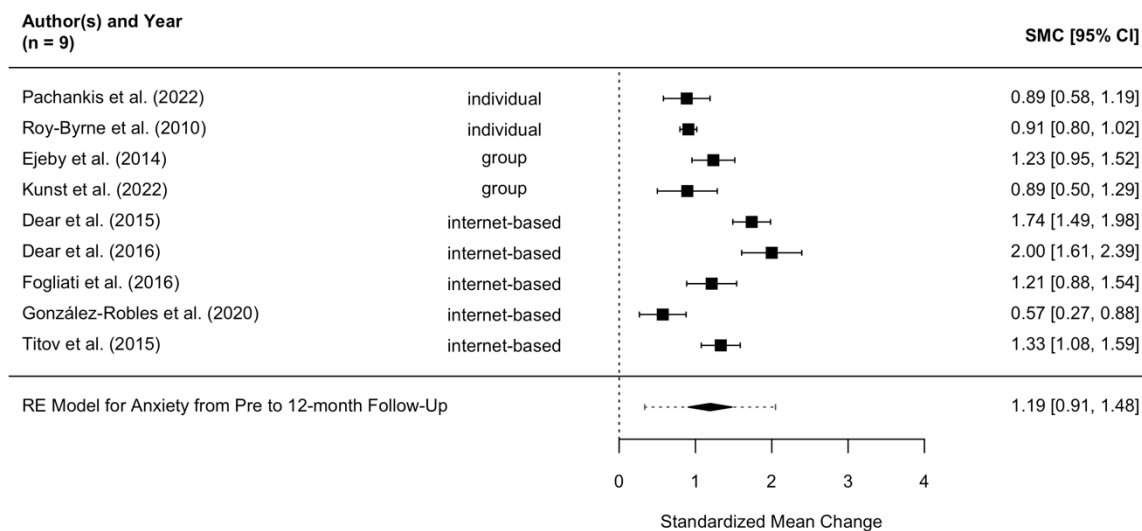

Supplementary Figure 18. Forest plot for anxiety from pre-treatment to 12-month follow-up

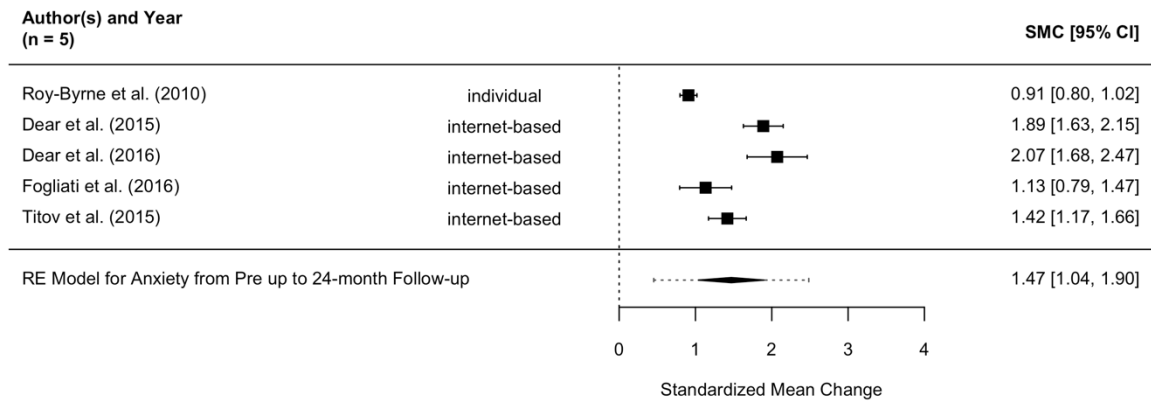

**Supplementary Figure 19.** Forest plot for anxiety from pre-treatment up to 24-month follow-up

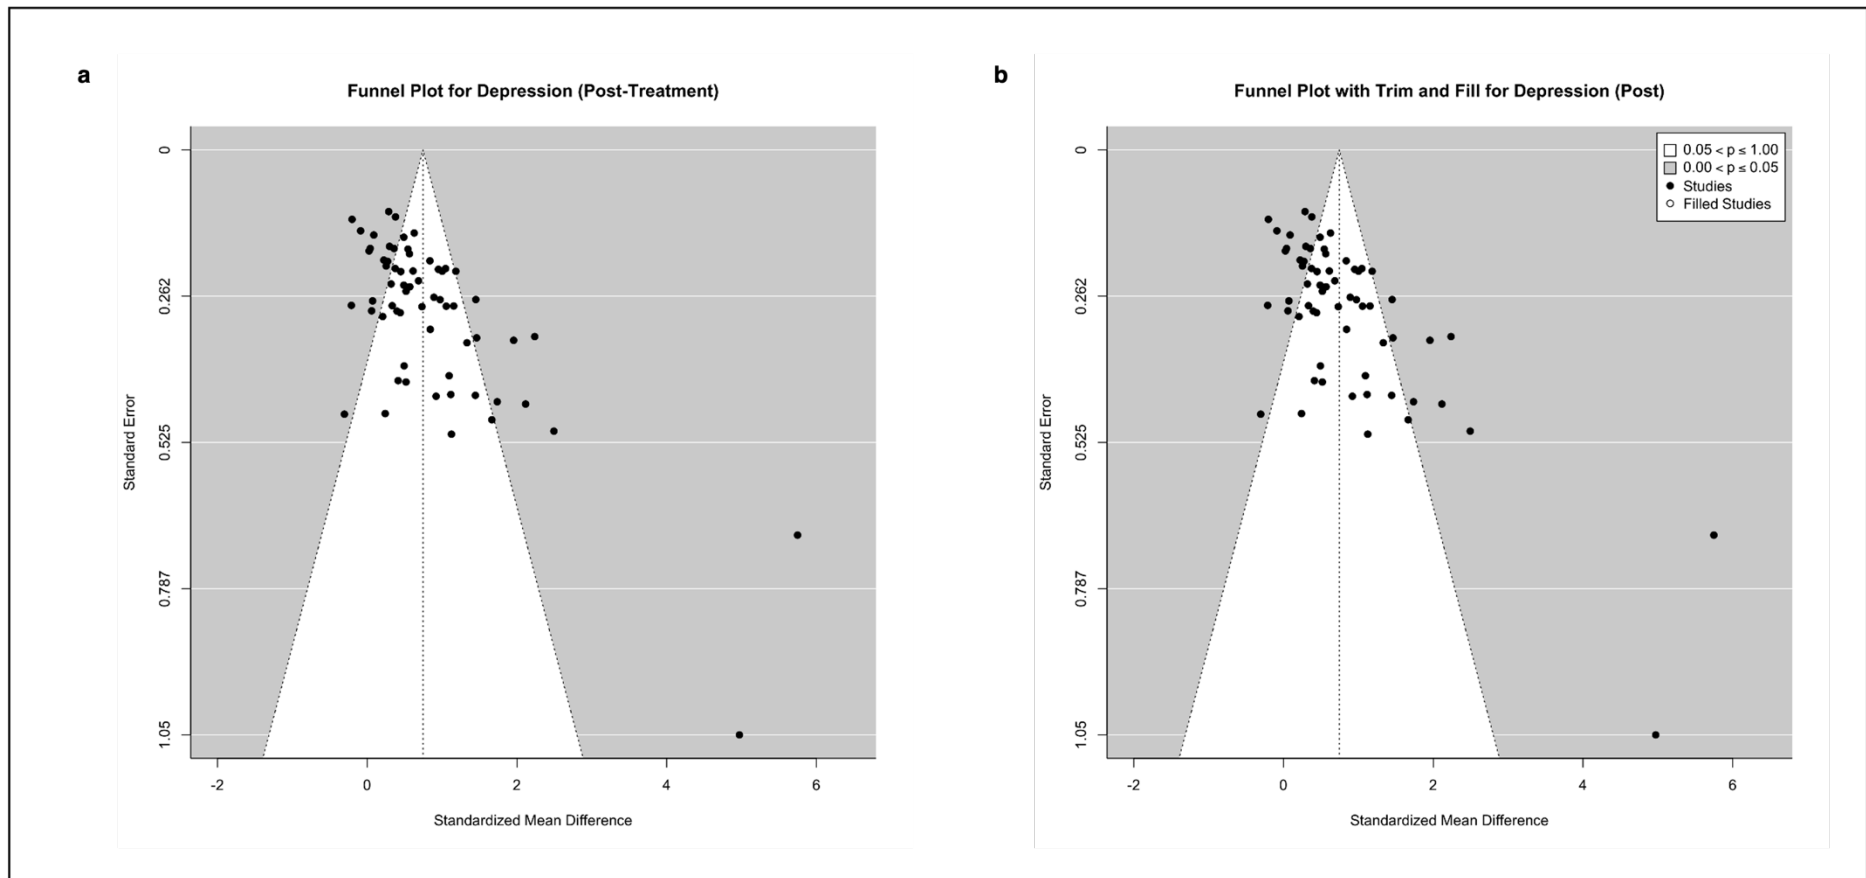

**Supplementary Figure 20.** Controlled Effects: Funnel plots for depression, a) without and b) with Trim and Fill Method

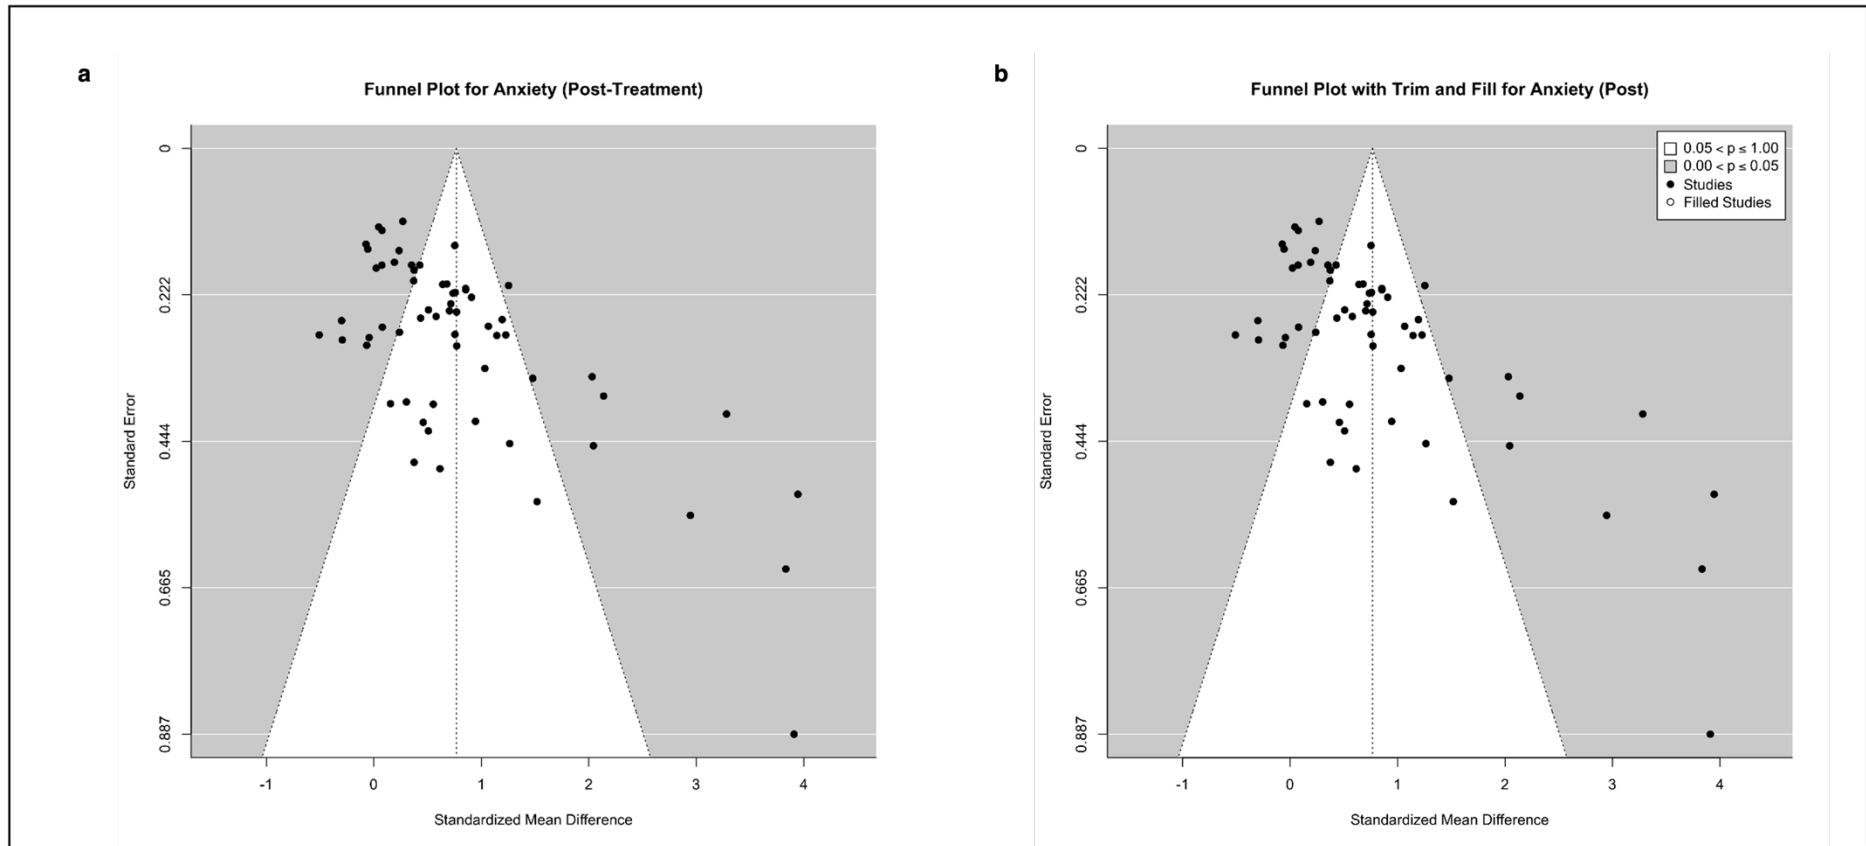

**Supplementary Figure 21.** Controlled Effects: Funnel plots for anxiety, a) without and b) with Trim and Fill Method

## **Additional Bayesian Analyses**

### **1. Statistical Procedure**

We corroborated the comparison between TD-CBT and DS-CBT for anxiety and depression post-treatment with additional Bayesian analyses. Using the brms-package, we applied a random-effects model and ran the analyses with 4000 iterations. Weakly informative priors were selected based on previous meta-analytic research (Harrer et al., 2021). For the distribution, we chose a normal distribution with a mean of 0 and a standard deviation of 1. This prior would imply that – in line with findings of meta-analytic comparisons of two active treatments - we expect approx. 95% of the effect size distribution to be values between -2 and 2. For the variance parameter, we chose a Half-Cauchy prior and set it to 0.5 (Williams et al., 2018). Half-Cauchy distributions are heavy tailed which makes less extreme values more likely. To assess the sensitivity of our analysis to different priors, we conducted a sensitivity analysis using alternative prior distributions. We considered a non-informative uniform prior as well as a stronger weakly informative prior to evaluate how different assumptions impact our results. Analysis code is shared on OSF.



**1.1 Forest Plots of Comparisons of TD-CBT and DS-CBT**

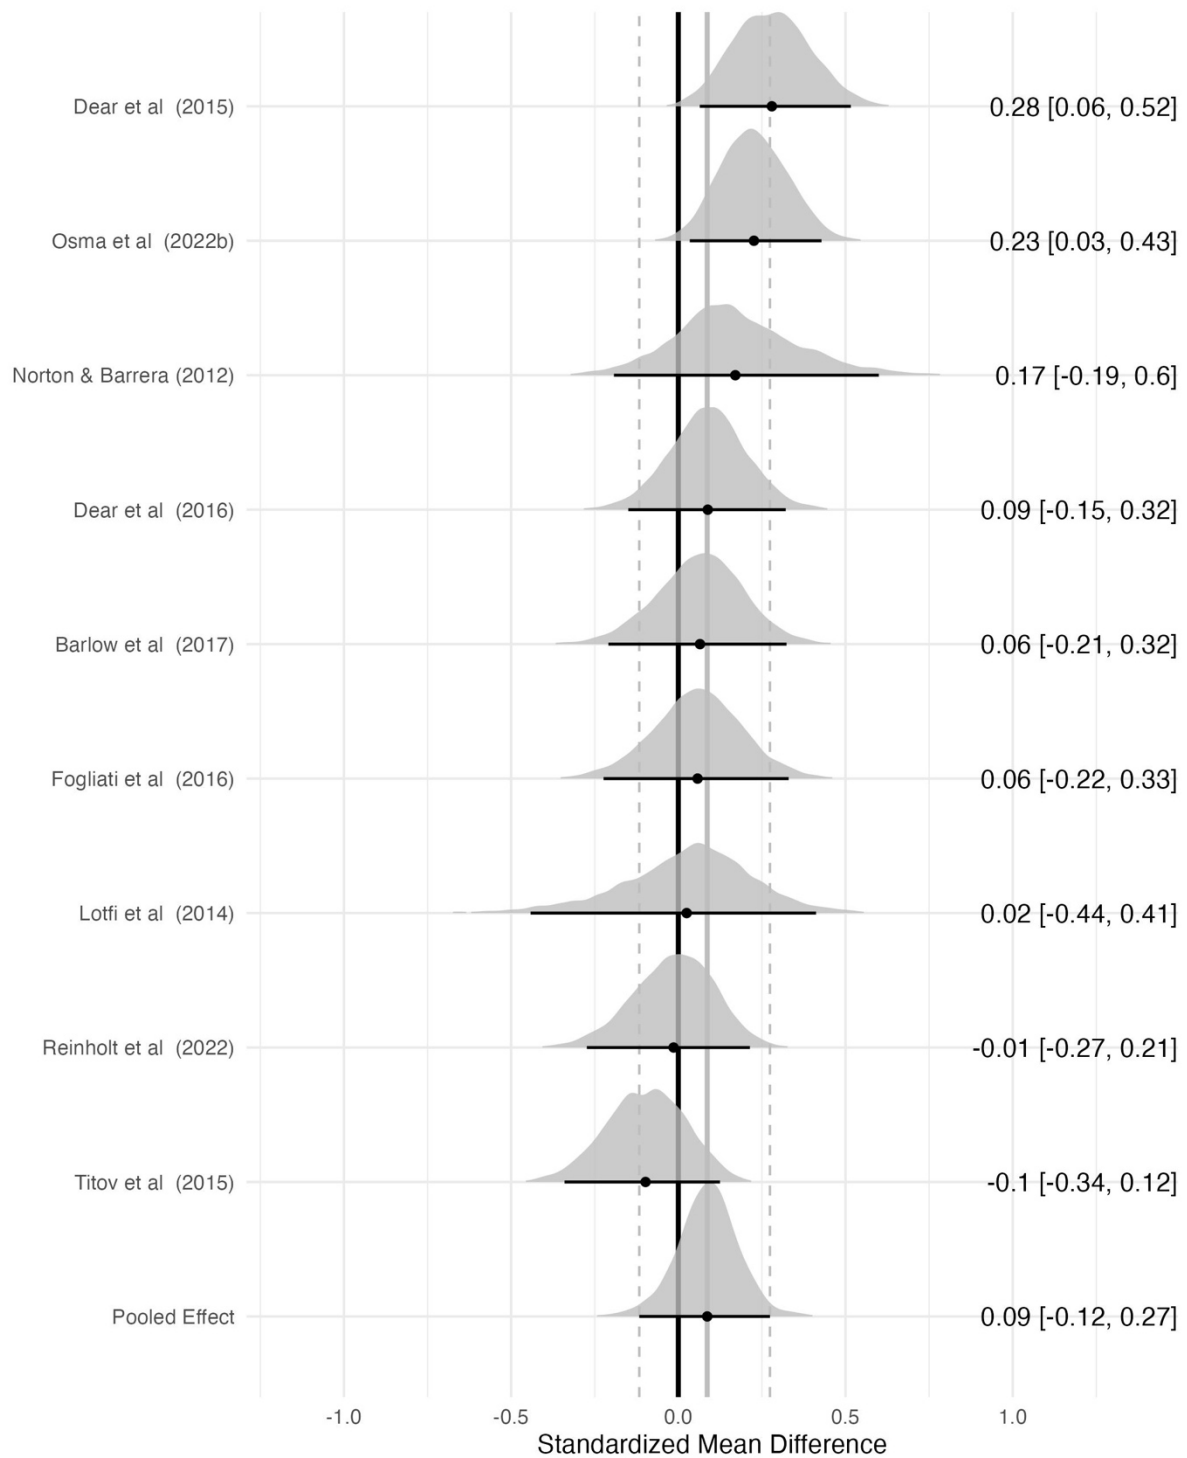

**Supplementary Figure 22.** Forest plot for depression comparing TD-CBT and DS-CBT (Bayesian analyses)

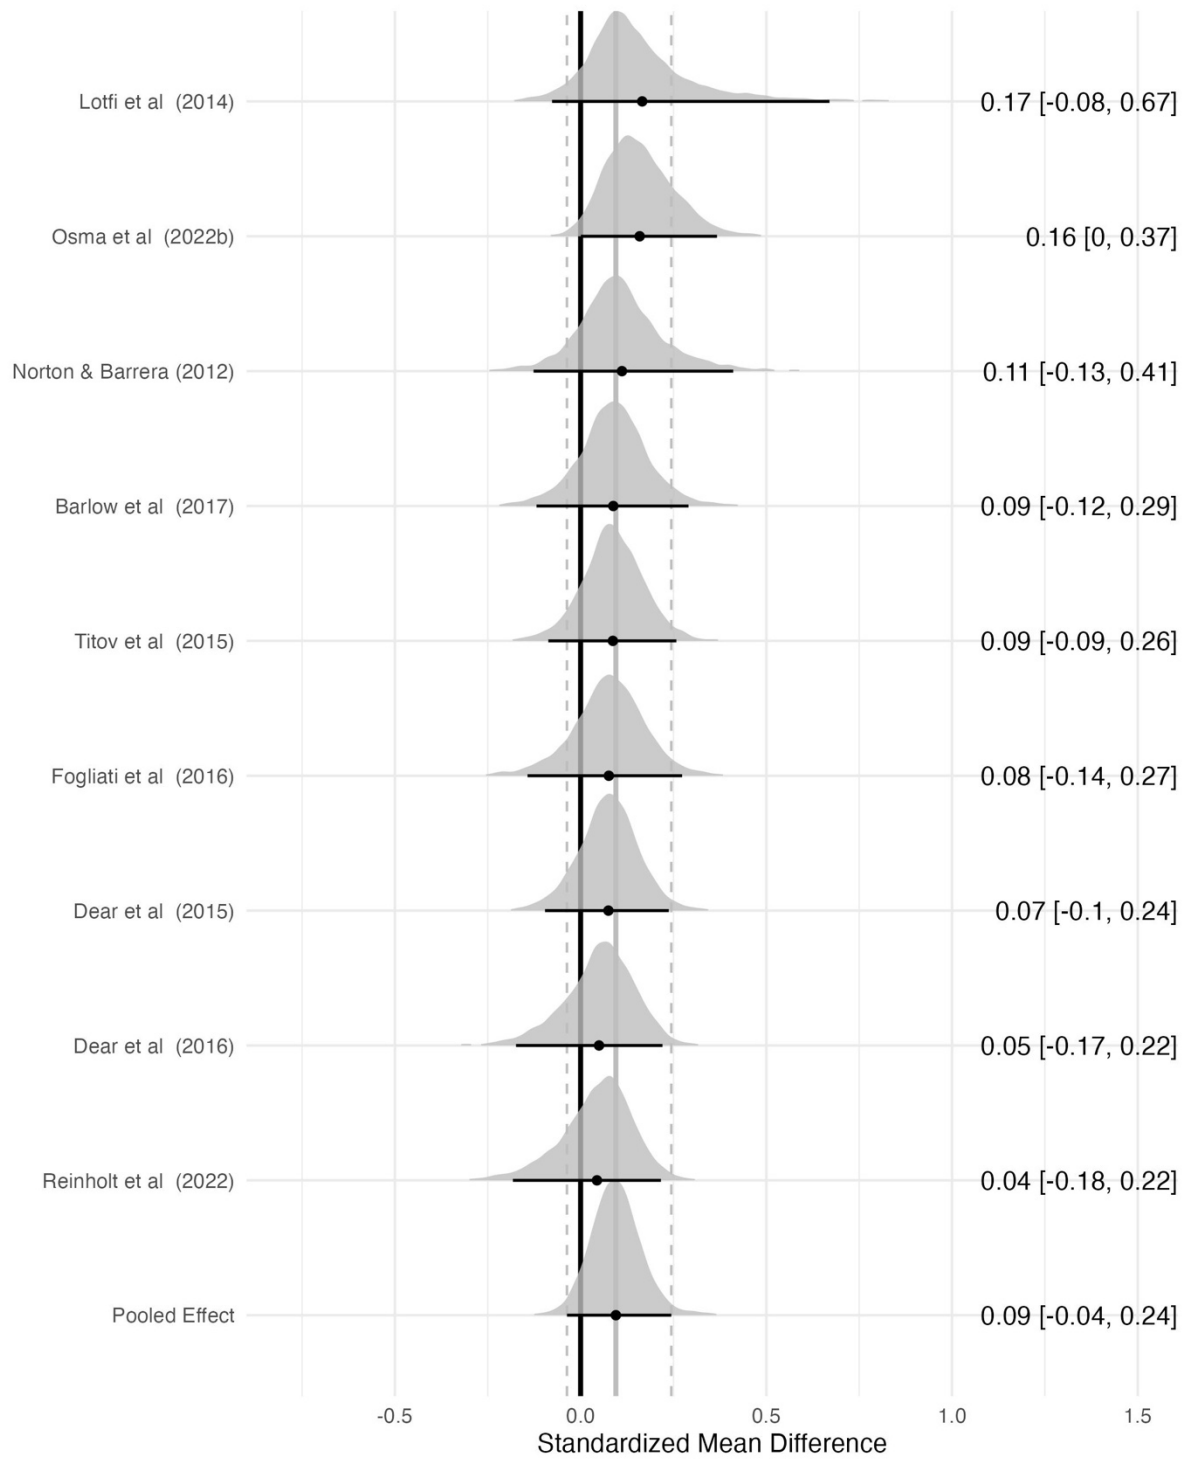

**Supplementary Figure 23.** Forest plot for anxiety comparing TD-CBT and DS-CBT (Bayesian analyses)

**1.2 Sensitivity Analyses with Different Priors of Comparisons TD-CBT and DS-CBT**

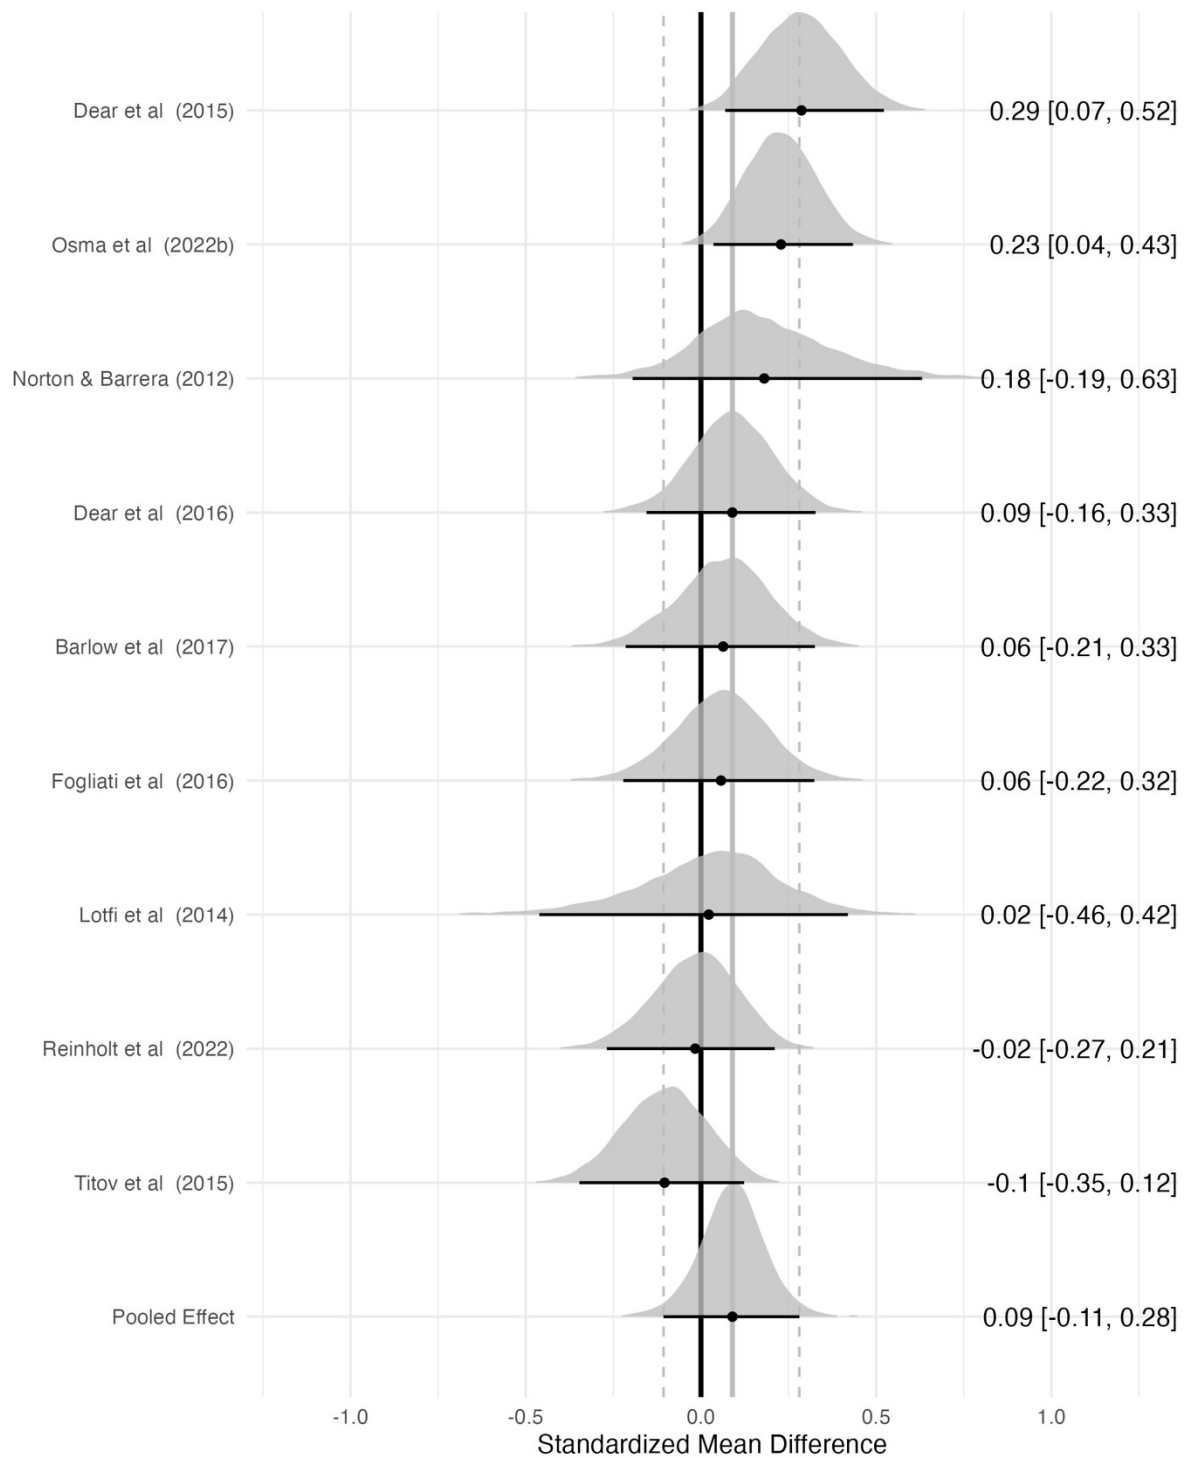

**Supplementary Figure 24.** Forest plot for depression comparing TD-CBT and DS-CBT applying a non-informative uniform prior with a wide range and a Cauchy prior with a large scale

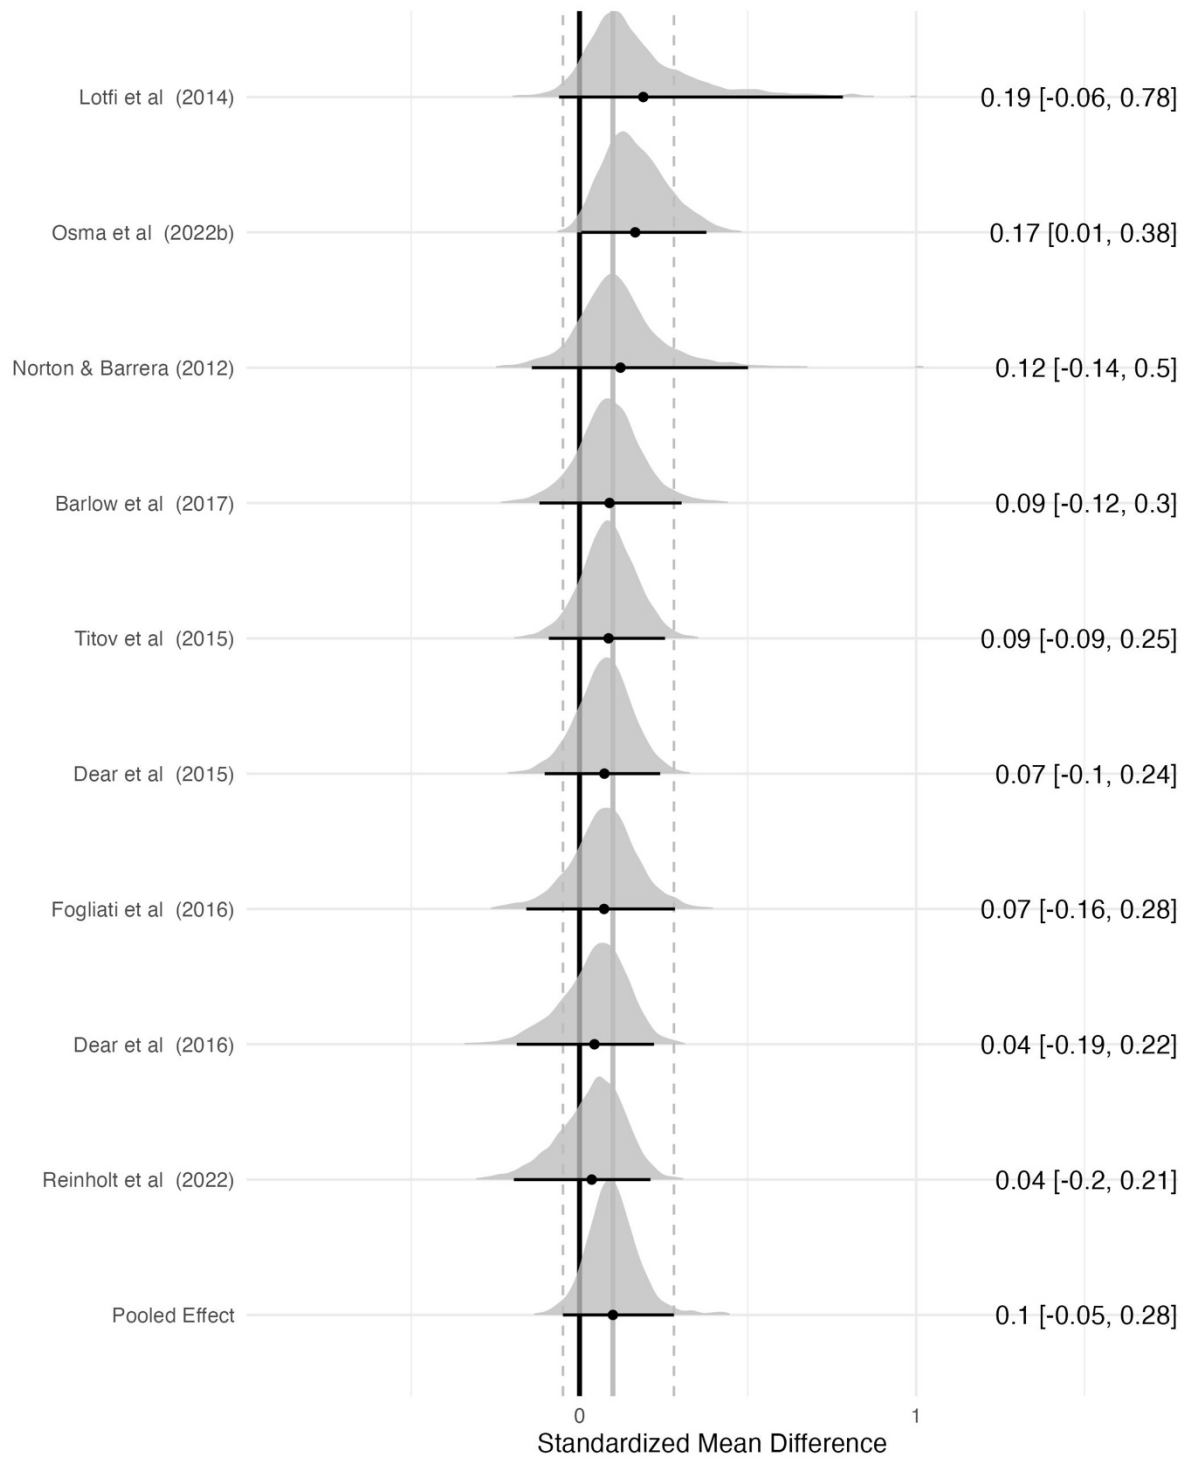

**Supplementary Figure 25.** Forest plot for anxiety comparing TD-CBT and DS-CBT applying a non-informative uniform prior with a wide range and a Cauchy prior with a large scale

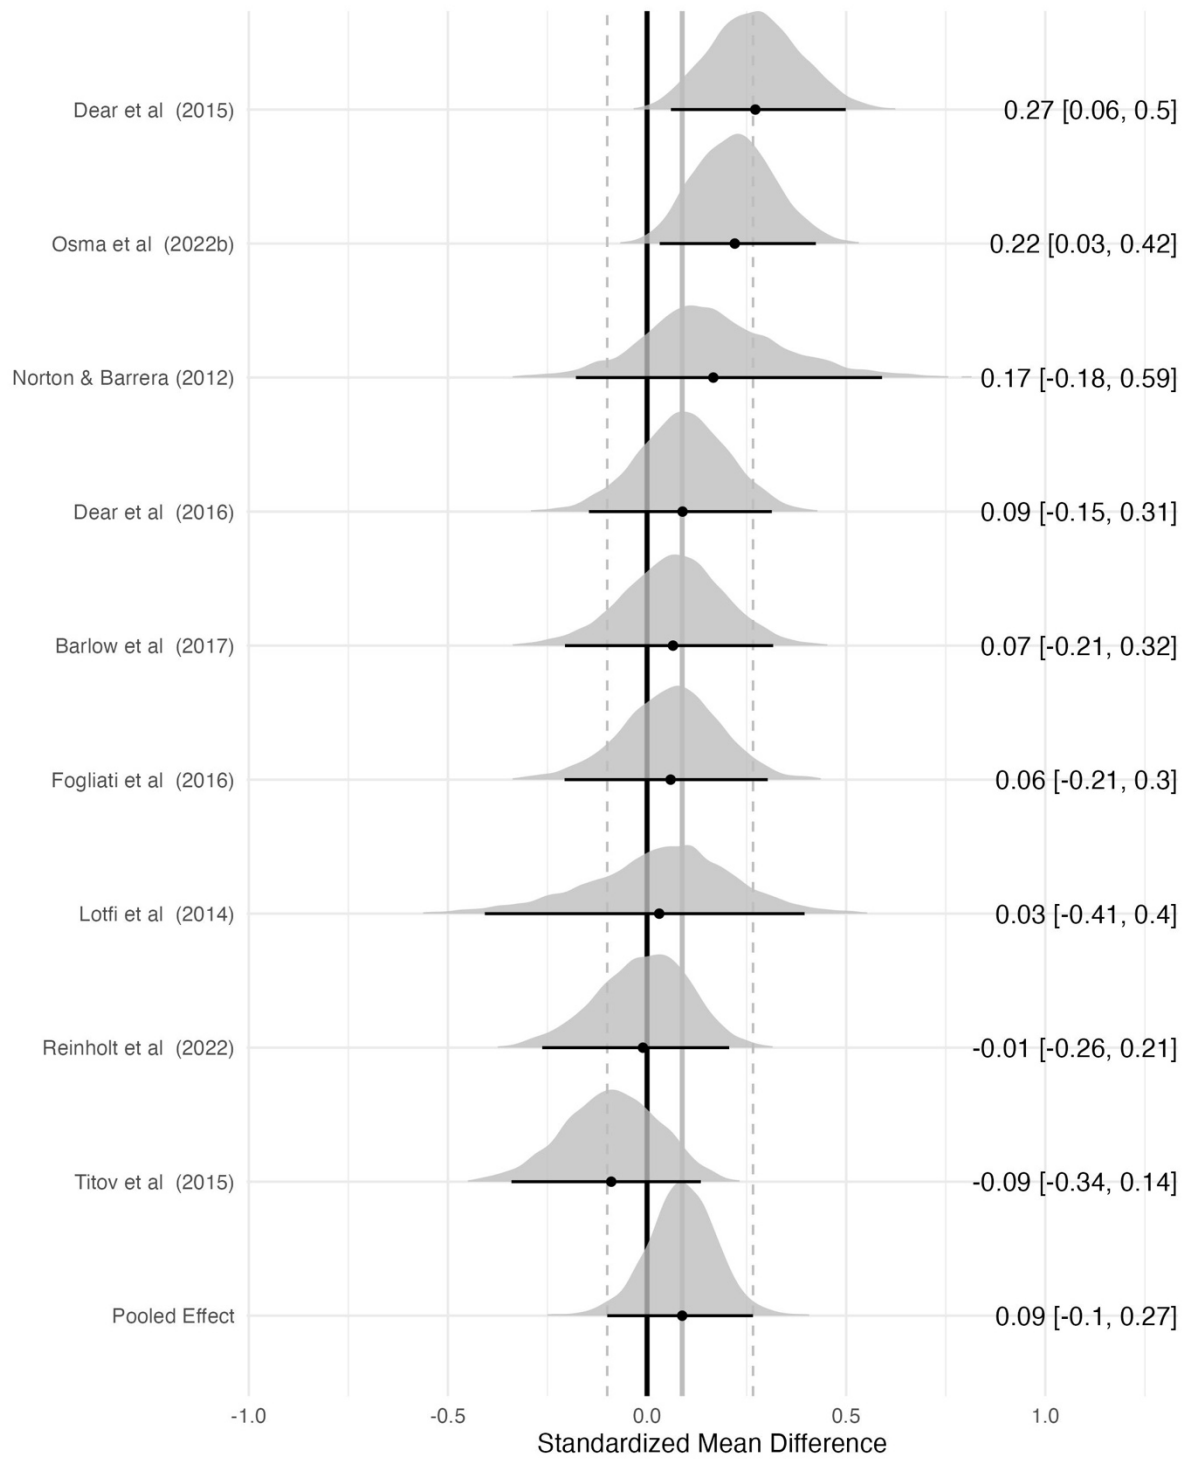

**Supplementary Figure 26.** Forest plot for depression comparing TD-CBT and DS-CBT applying a weakly informative prior with a smaller distribution and a less conservative Half-Cauchy prior

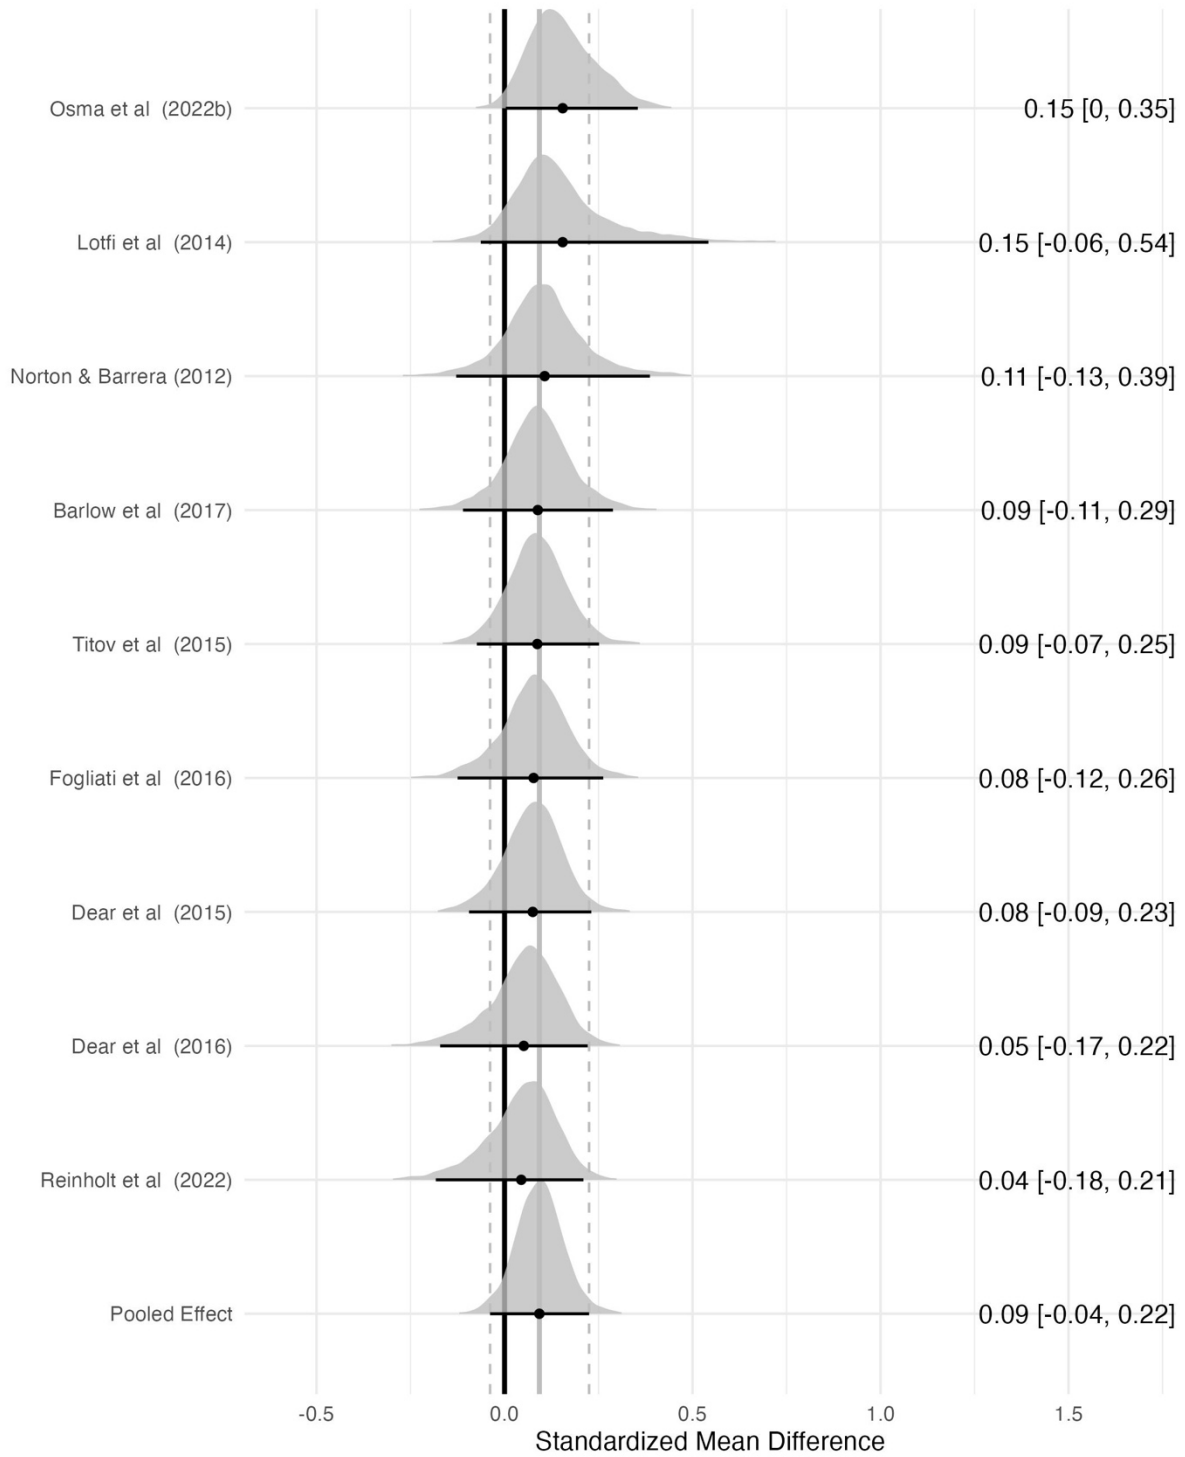

**Supplementary Figure 27.** Forest plot for anxiety comparing TD-CBT and DS-CBT applying a weakly informative prior with a smaller distribution and a less conservative Half-Cauchy prior
